# Supplementary material for: Subcompartmentalization by cross-membranes during early growth of Streptomyces hyphae
Source: PubMed Central journal article supplement (PMC4990651; doi:10.1038/ncomms12467), 2016-08-12

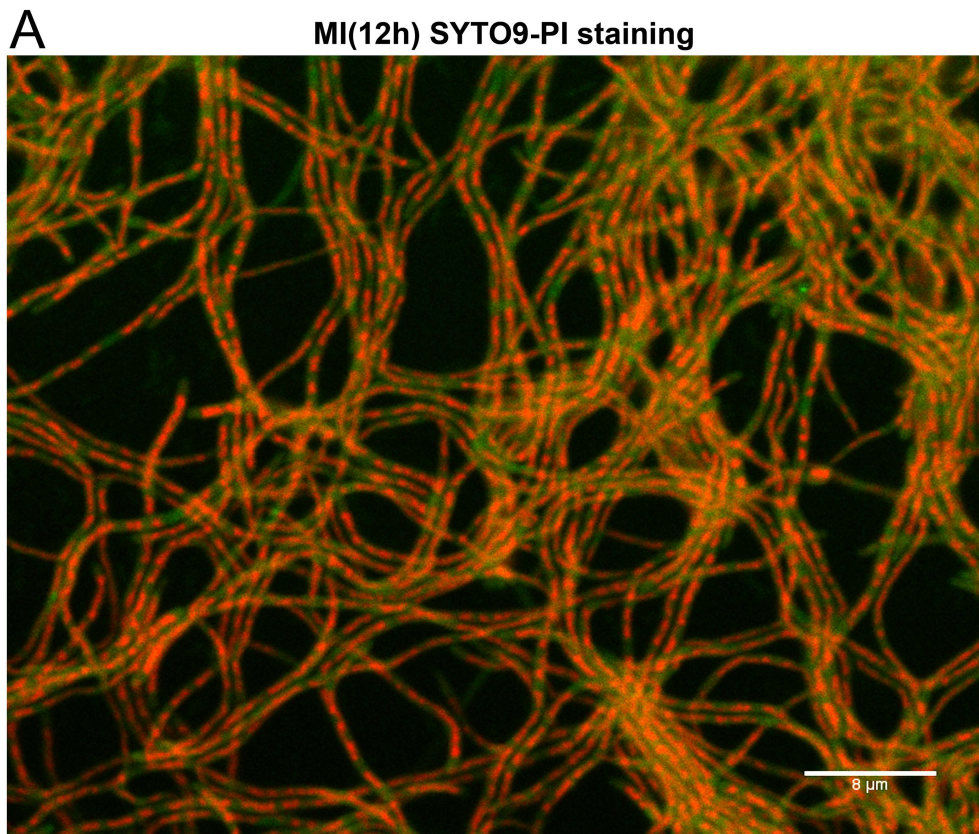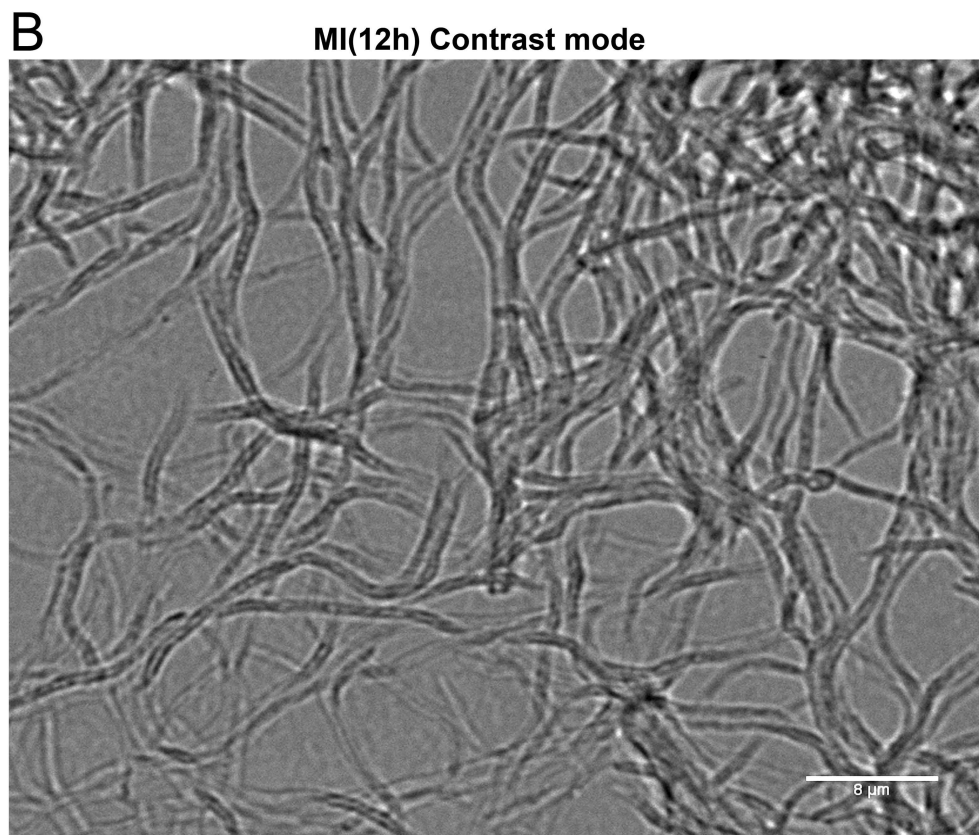

**Supplementary Fig. 1. Images showing *S. coelicolor* hyphae compartmentalization.** (A-D; G,H) MI; (E) transition from MI to MII; (F) sporulating hyphae. Segments and Z-rings used to quantify compartment lengths and Z-ring spacing are marked. Scale bars correspond to 8  $\mu\text{m}$ .

(A) MI hyphae stained with PI (red) and SYTO9 (green).

(B) Contrast mode of the image shown in (A).

**C****MI(10h) SYTO9-PI staining**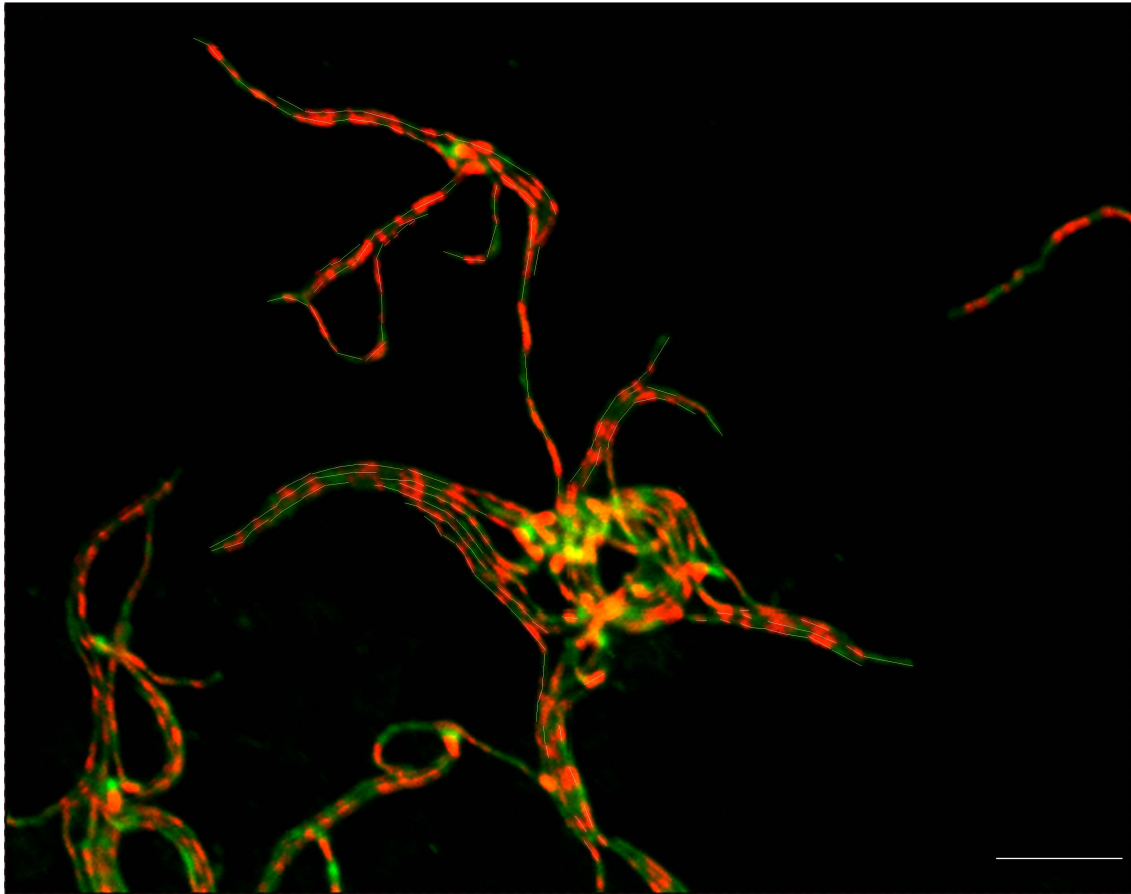**PI stained segments**

- 103 segments
- Mean: 1.12  $\mu\text{m}$
- SD 0.38  $\mu\text{m}$
- Median 1.05  $\mu\text{m}$

**SYTO9 stained segments**

- 103 segments
- Mean: 0.92  $\mu\text{m}$
- SD 0.25  $\mu\text{m}$
- Median 0.88  $\mu\text{m}$

**Supplementary Fig. 1. Images showing *S. coelicolor* hyphae compartmentalization.** (A-D; G,H) MI; (E) transition from MI to MII; (F) sporulating hyphae. Segments and Z-rings used to quantify compartment lengths and Z-ring spacing are marked. Scale bars correspond to 8  $\mu\text{m}$ .

(C) Master image used to quantify PI- and SYTO9-stained segments in the MI hyphae.

D

MI(10h) YOPRO-1 PI staining

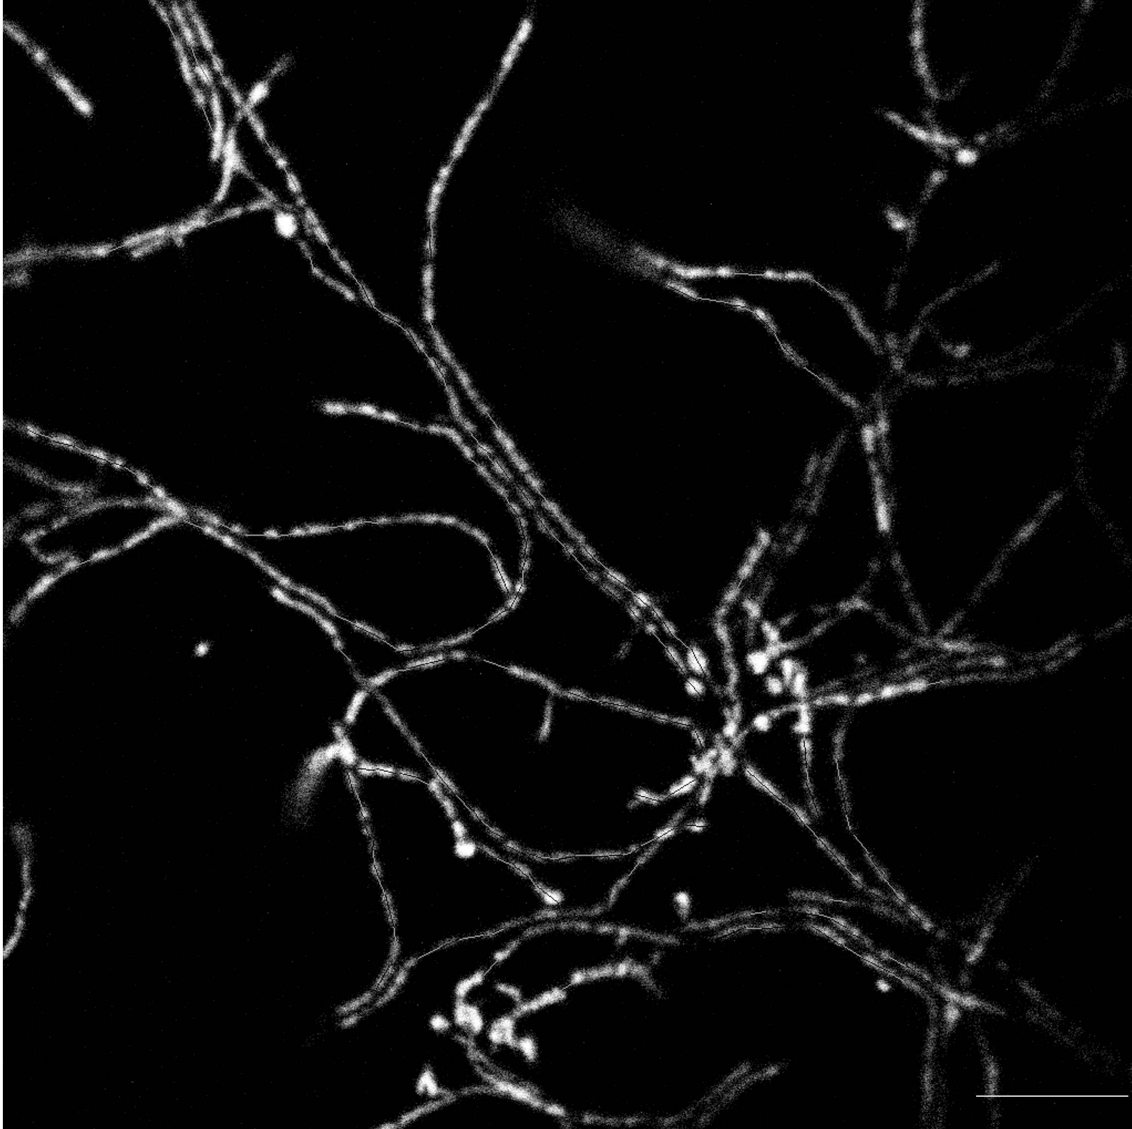

**YOPRO-1/PI stained segments**

- 102 segments
- Mean: 1.1  $\mu\text{m}$
- SD 0.41  $\mu\text{m}$
- Median 0.99  $\mu\text{m}$

**Unstained segments**

- 100 segments
- Mean: 0.94  $\mu\text{m}$
- SD 0.21  $\mu\text{m}$
- Median 0.91  $\mu\text{m}$

**Supplementary Fig. 1. Images showing *S. coelicolor* hyphae compartmentalization.**

(A-D; G,H) MI; (E) transition from MI to MII; (F) sporulating hyphae. Segments and Z-rings used to quantify compartment lengths and Z-ring spacing are marked. Scale bars correspond to 8  $\mu\text{m}$ .

(D) Master image used to quantify YOPRO-1- and PI-stained and unstained segments in the MI hyphae. The same segments were stained with YOPRO-1 and PI.

**E****Transition MI-MII(18h) SYTO9-PI staining**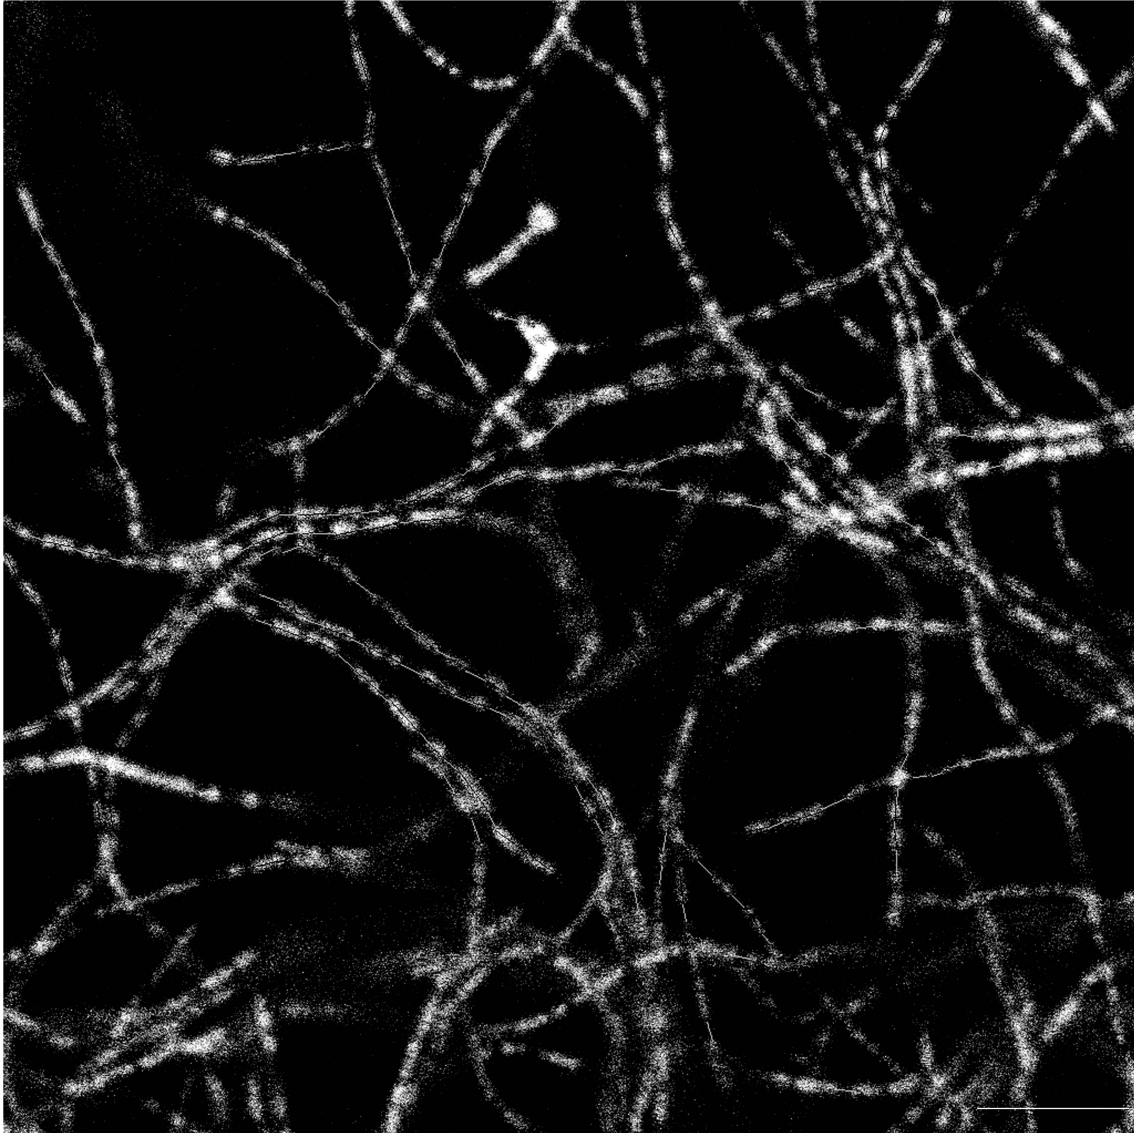**SYTO9 stained segments**

- 102 segments
- Mean: 1.5  $\mu\text{m}$
- SD 0.55  $\mu\text{m}$
- Median 1.51  $\mu\text{m}$

**Unstained segments**

- 101 segments
- Mean: 0.91  $\mu\text{m}$
- SD 0.17  $\mu\text{m}$
- Median 0.93  $\mu\text{m}$

**Supplementary Fig. 1. Images showing *S. coelicolor* hyphae compartmentalization.** (A-D; G,H) MI; (E) transition from MI to MII;(F) sporulating hyphae. Segments and Z-rings used to quantify compartment lengths and Z-ring spacing are marked. Scale bars correspond to 8  $\mu\text{m}$ .

(E) Master image used to quantify SYTO9-stained and unstained cellular segments in the transition from the MI to MII stage. Cells were stained with SYTO9 and PI, but at this stage, no cells were labelled by PI (see the manuscript for details).

**F****Spores(72h) SYTO9-PI staining**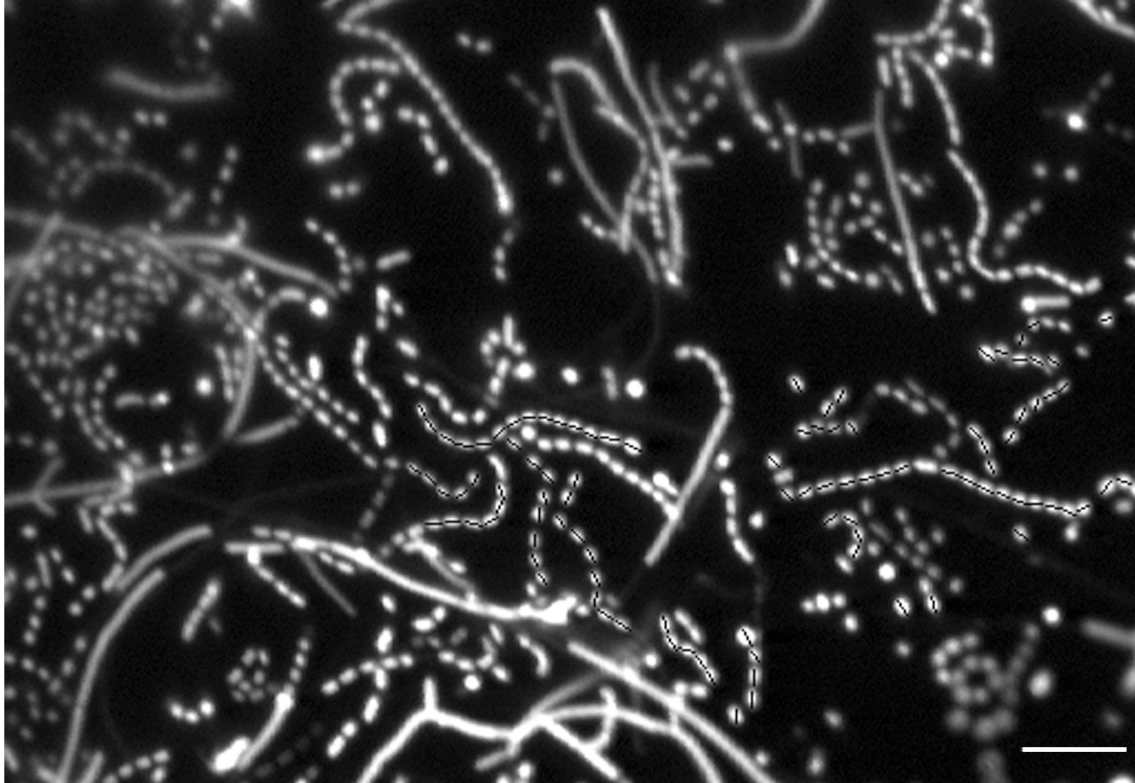**Spore diameter**

- 101 segments
- Mean: 0.99  $\mu\text{m}$
- SD 0.16  $\mu\text{m}$
- Median 0.98  $\mu\text{m}$

**Supplementary Fig. 1. Images showing *S. coelicolor* hyphae compartmentalization.** (A-D; G,H) MI; (E) transition from MI to MII;(F) sporulating hyphae. Segments and Z-rings used to quantify compartment lengths and Z-ring spacing are marked. Scale bars correspond to 8  $\mu\text{m}$ .

(F) Master image used to quantify spore diameter. Hyphae were stained with PI and SYTO9.

**G** eGFP-FtsZ (maximum projection of the time lapse experiment)

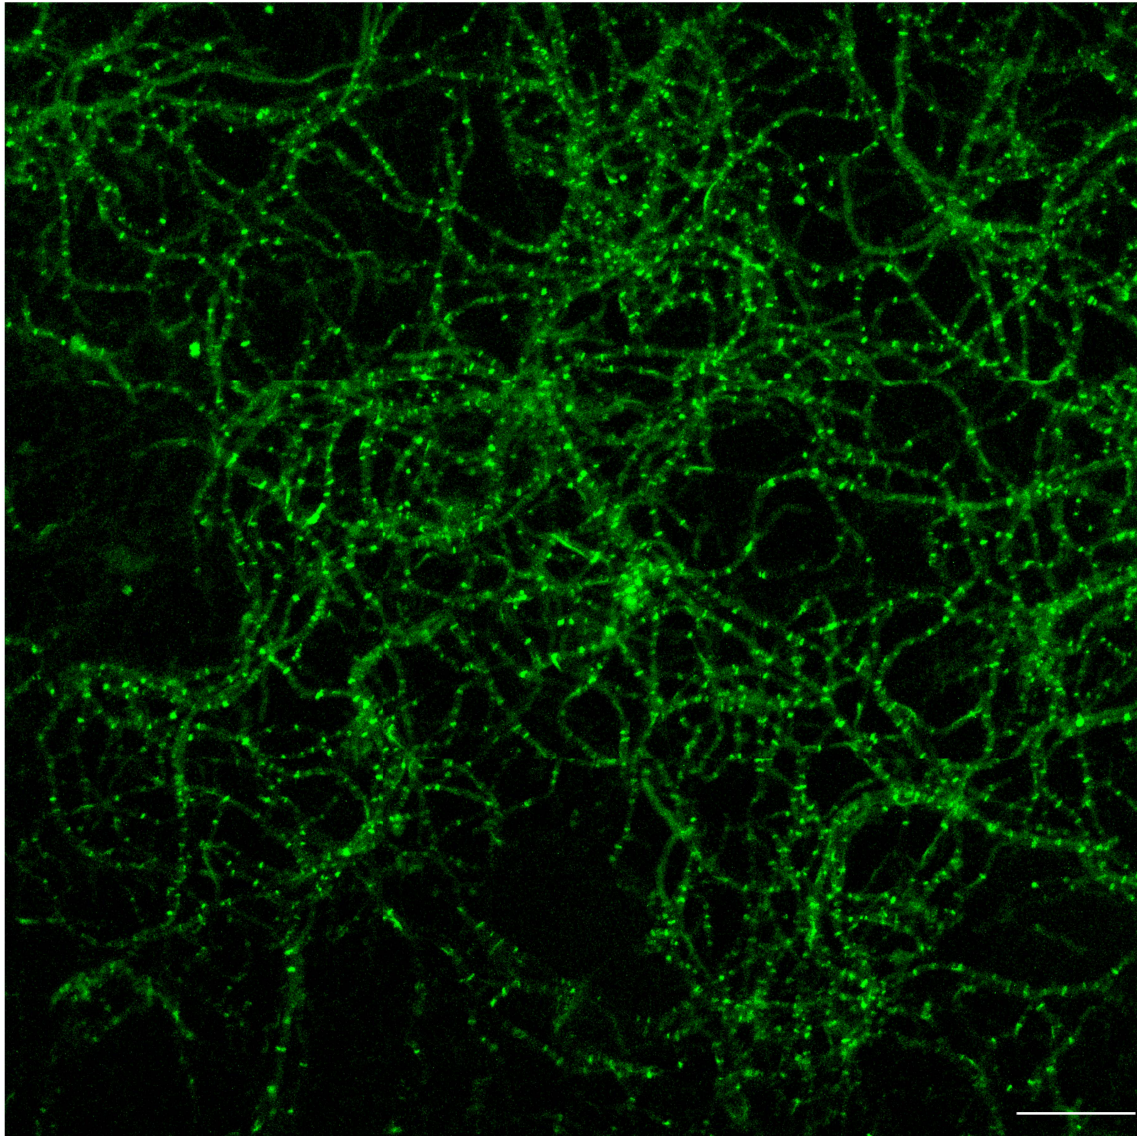

**Supplementary Fig. 1. Images showing *S. coelicolor* hyphae compartmentalization.** (A-D; G,H) MI; (E) transition from MI to MII; (F) sporulating hyphae. Segments and Z-rings used to quantify compartment lengths and Z-ring spacing are marked. Scale bars correspond to 8  $\mu\text{m}$ .

(G) Master image (maximum projection of the time lapse experiment) used to quantify Z-ring spacing in *S. coelicolor* FM145 expressing FtsZ-eGFP.

## H eGFP-FtsZ (maximum projection) processed for quantification

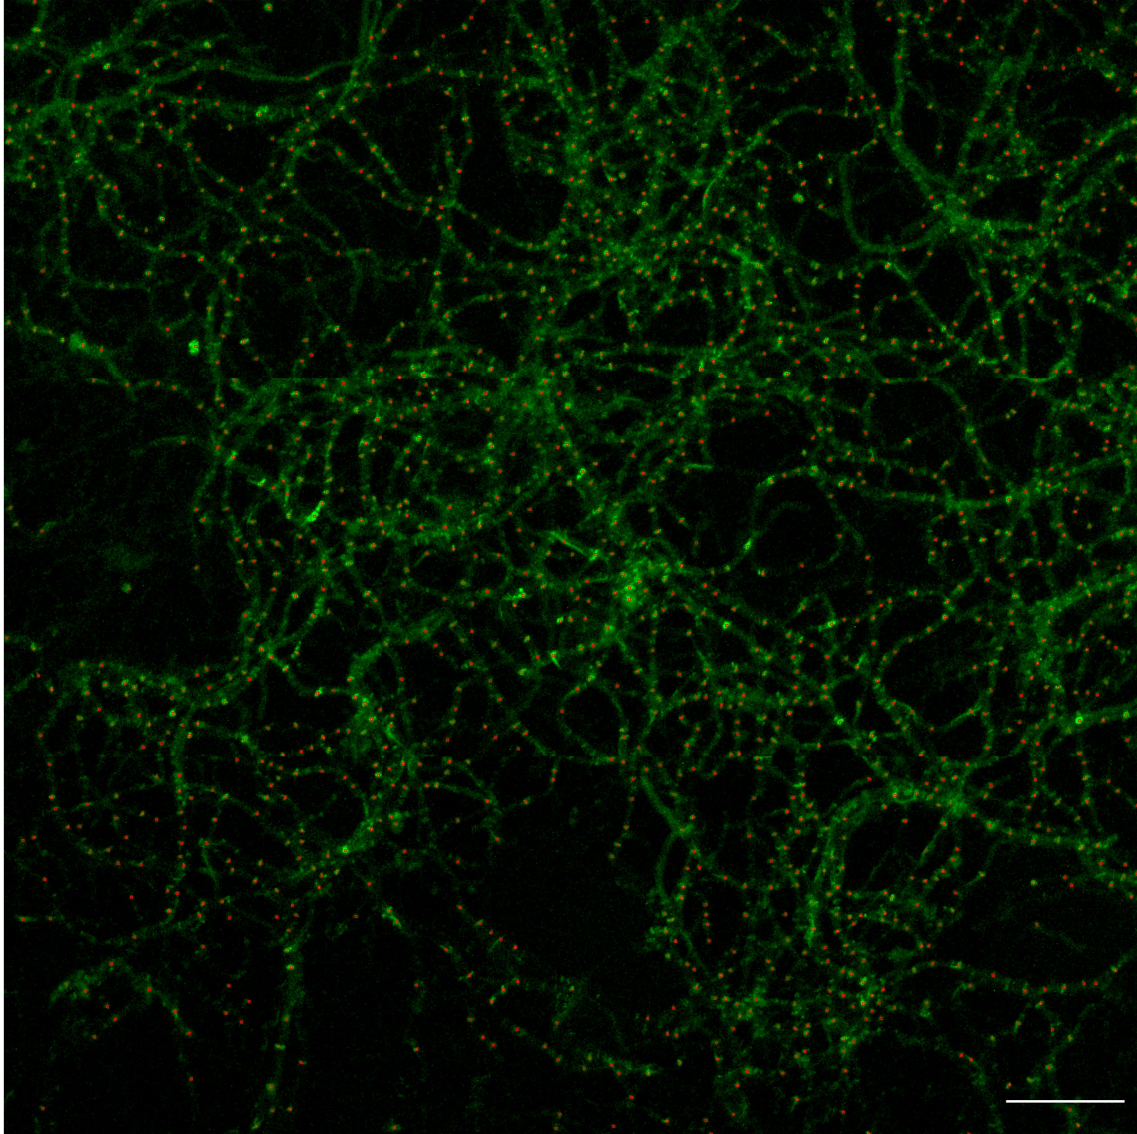

### eGFP Z-ring spacing

- 1514 Z-rings
- Mean: 1.12  $\mu\text{m}$
- SD 0.48  $\mu\text{m}$
- Median 1.03  $\mu\text{m}$

**Supplementary Fig. 1. Images showing *S. coelicolor* hyphae compartmentalization.** (A-D; G,H) MI; (E) transition from MI to MII; (F) sporulating hyphae. Segments and Z-rings used to quantify compartment lengths and Z-ring spacing are marked. Scale bars correspond to 8  $\mu\text{m}$ .

(H) Same image as (G) processed for quantification.

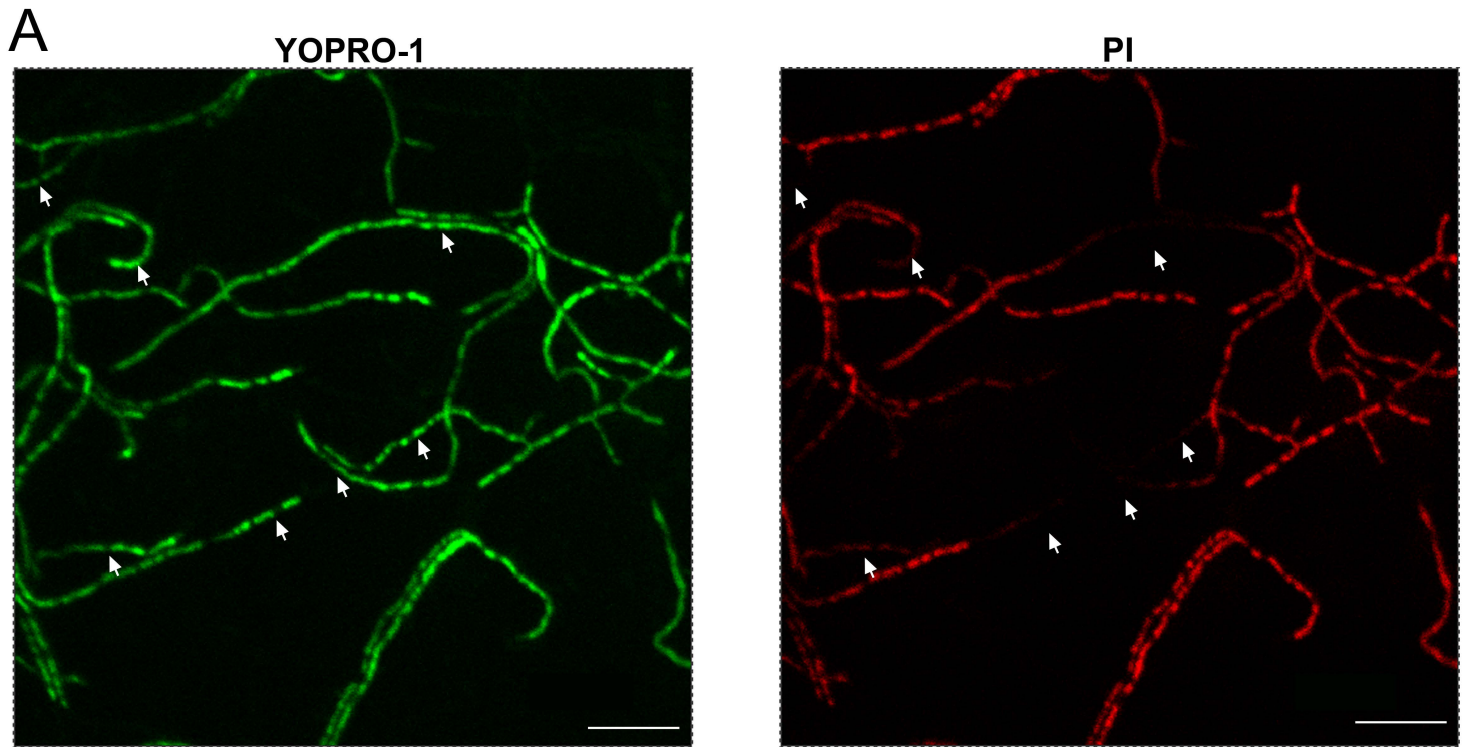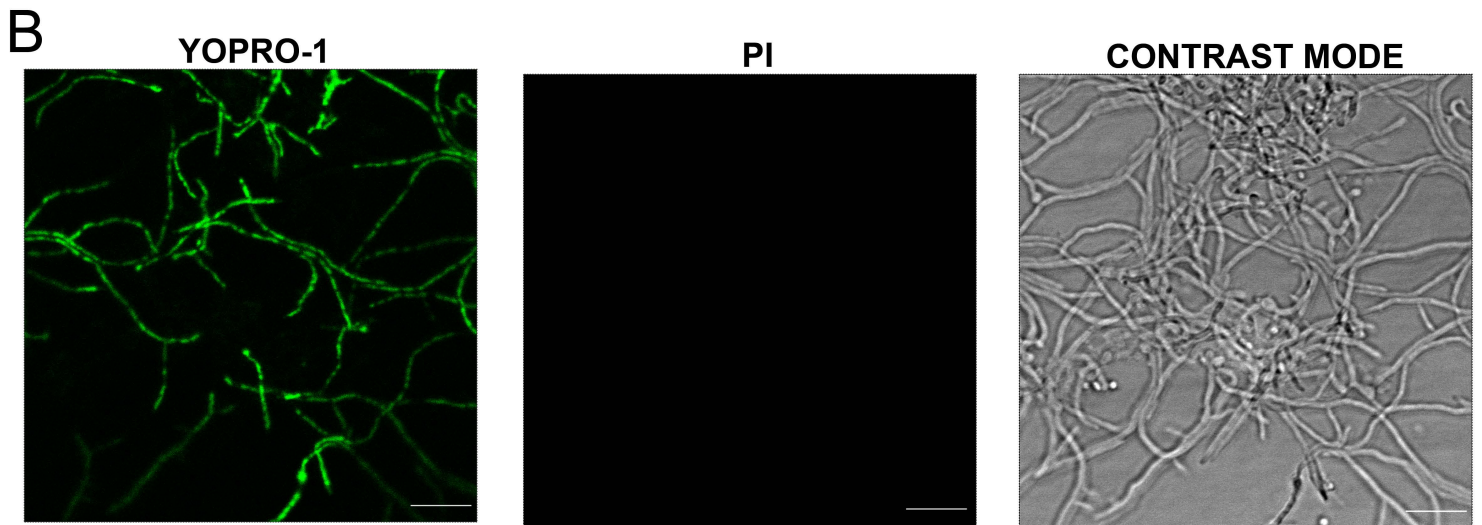

**Supplementary Fig. 2. Permeability of MI hyphae (10-hours) to YOPRO-1 and PI.**  
 Scale bars correspond to 8  $\mu\text{m}$ .

(A) Slowly processed samples (minutes). All segments stained with PI (red) are also stained with YOPRO-1 (green), but some segments stained with YOPRO-1 are not stained with PI (labelled with arrows).

(B) Rapidly processed samples (seconds). Dying cells are permeable to YOPRO-1 but not to PI.



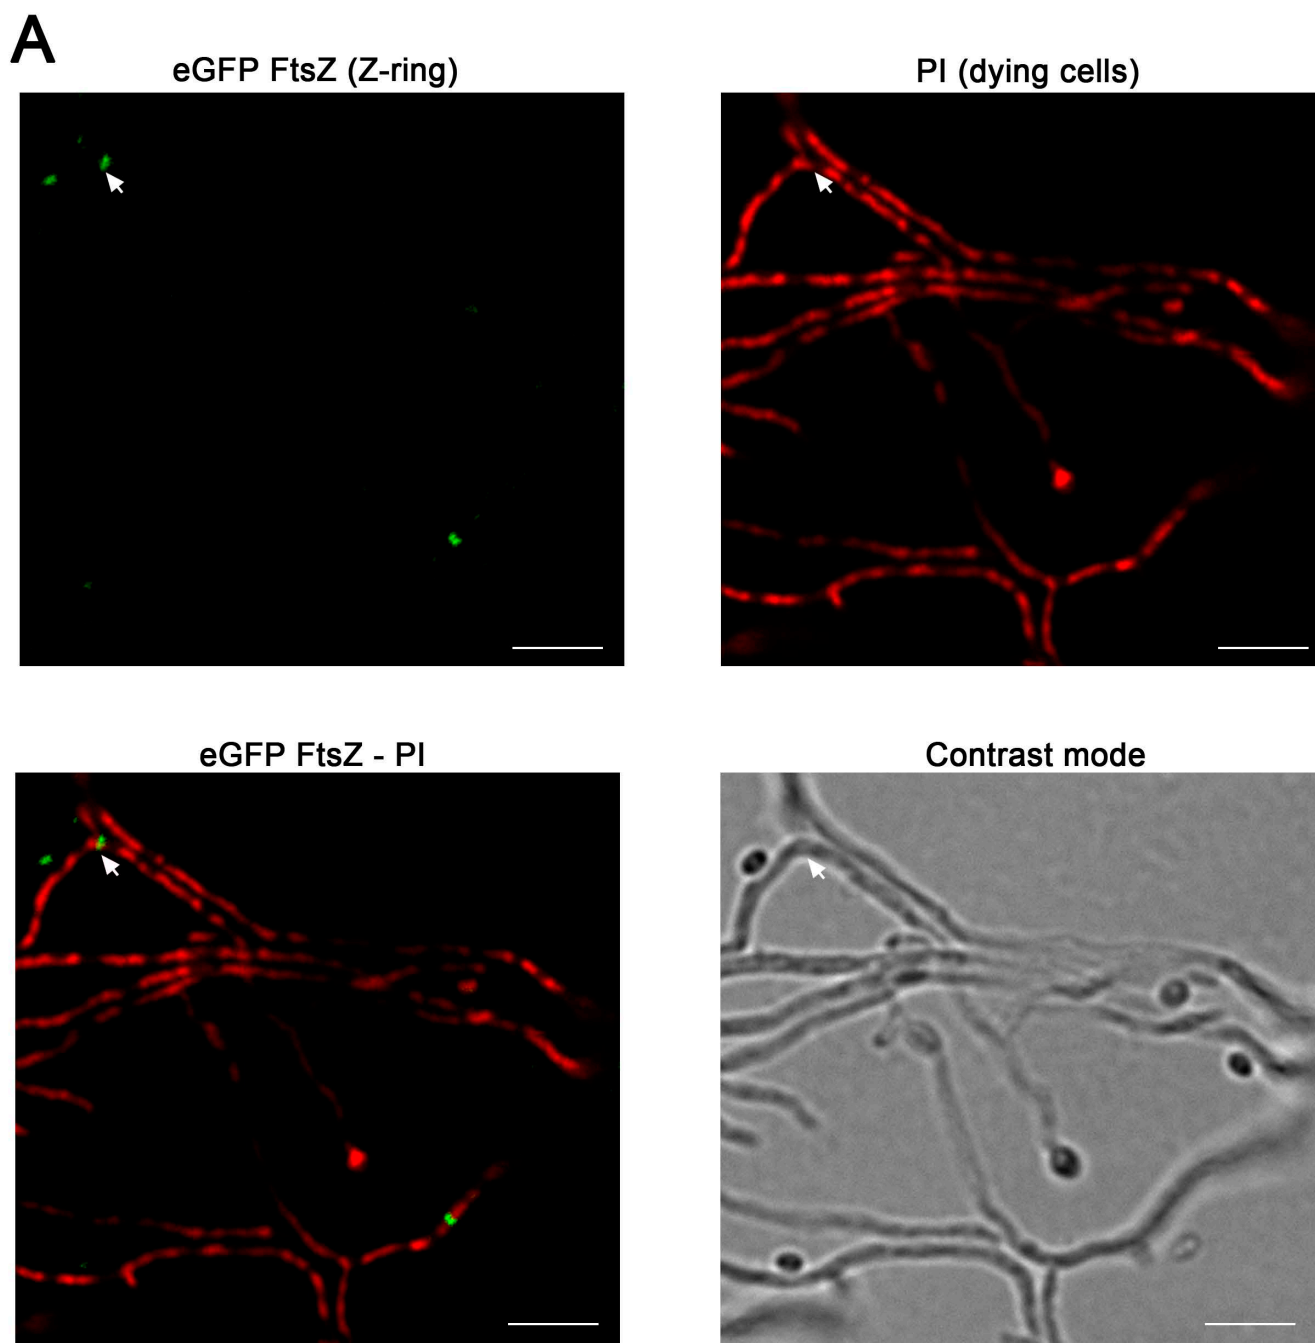

**Supplementary Fig. 3. Images showing the colocalization of Z-rings, PI permeability barriers, cross-membranes and cross-walls. Scale bars correspond to 4  $\mu$ m. (A-D) eGFP-FtsZ (Z-rings, green) and PI (dying cells, red) staining. Arrows indicate Z-rings colocalizing with PI permeability borders. Ten-hour GYM solid cultures.**

**B**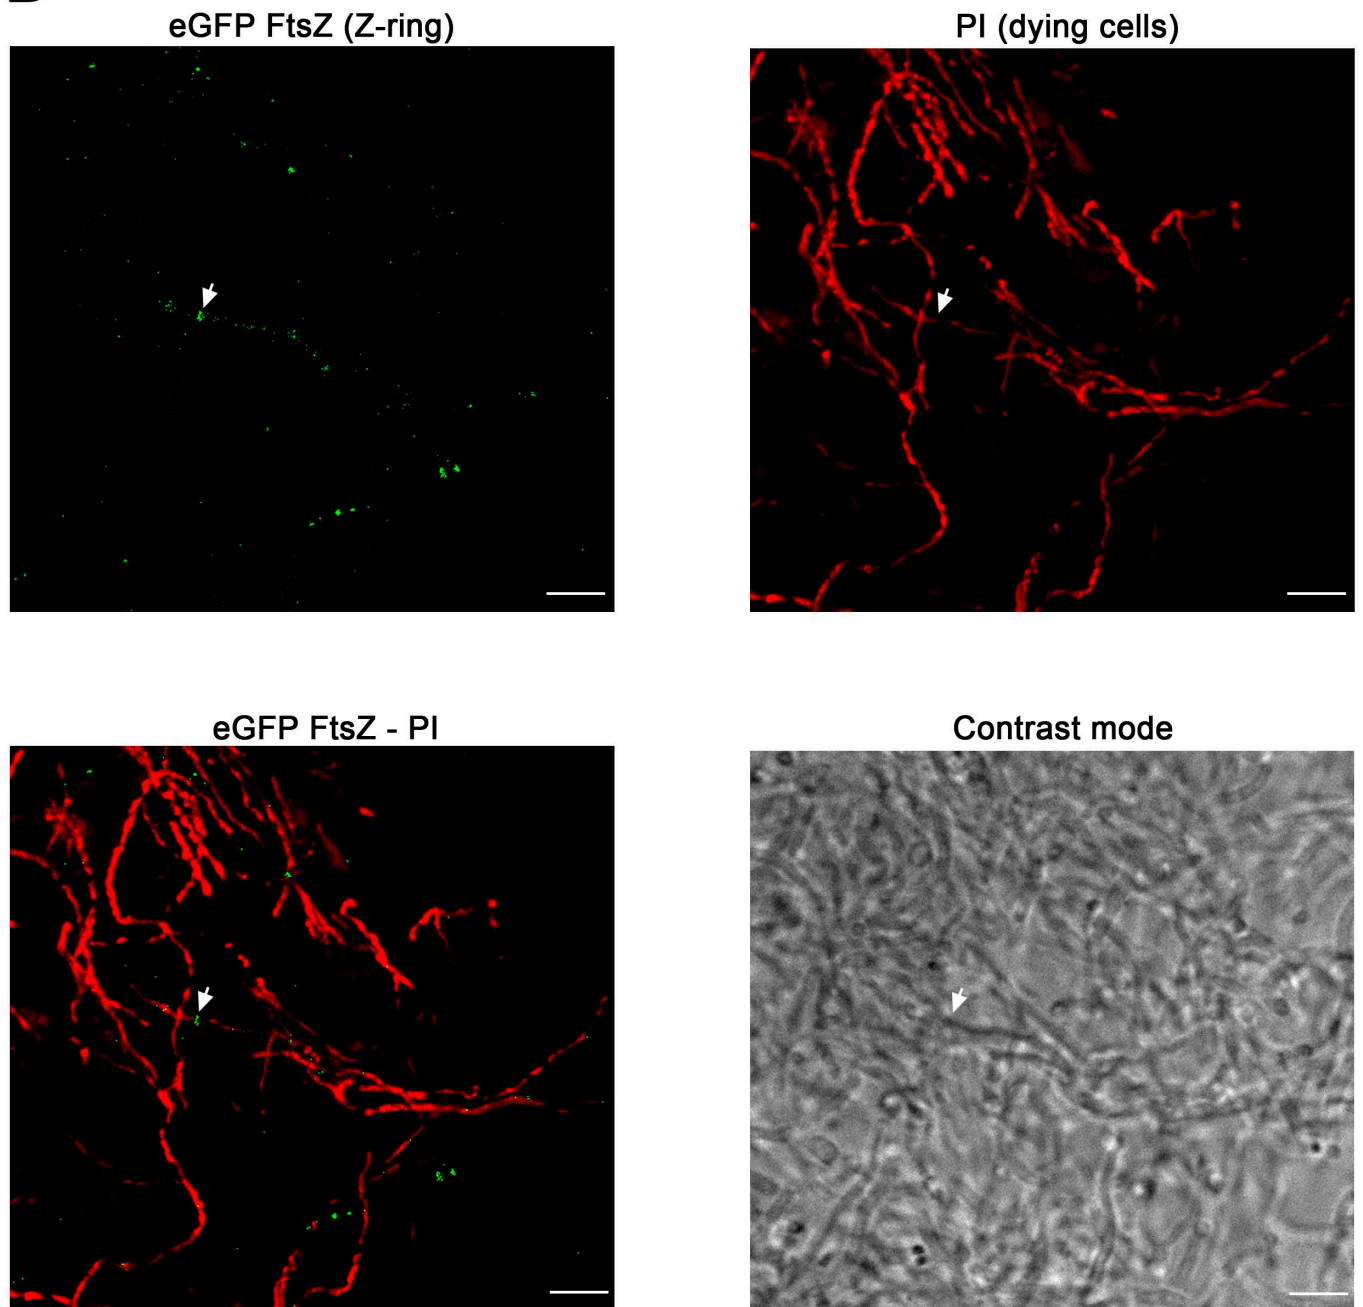

**Supplementary Fig. 3. Images showing the colocalization of Z-rings, PI permeability barriers, cross-membranes and cross-walls.** Scale bars correspond to 4  $\mu\text{m}$ . (A-D) eGFP-FtsZ (Z-rings, green) and PI (dying cells, red) staining. Arrows indicate Z-rings colocalizing with PI permeability borders. Ten-hour GYM solid cultures.

**C**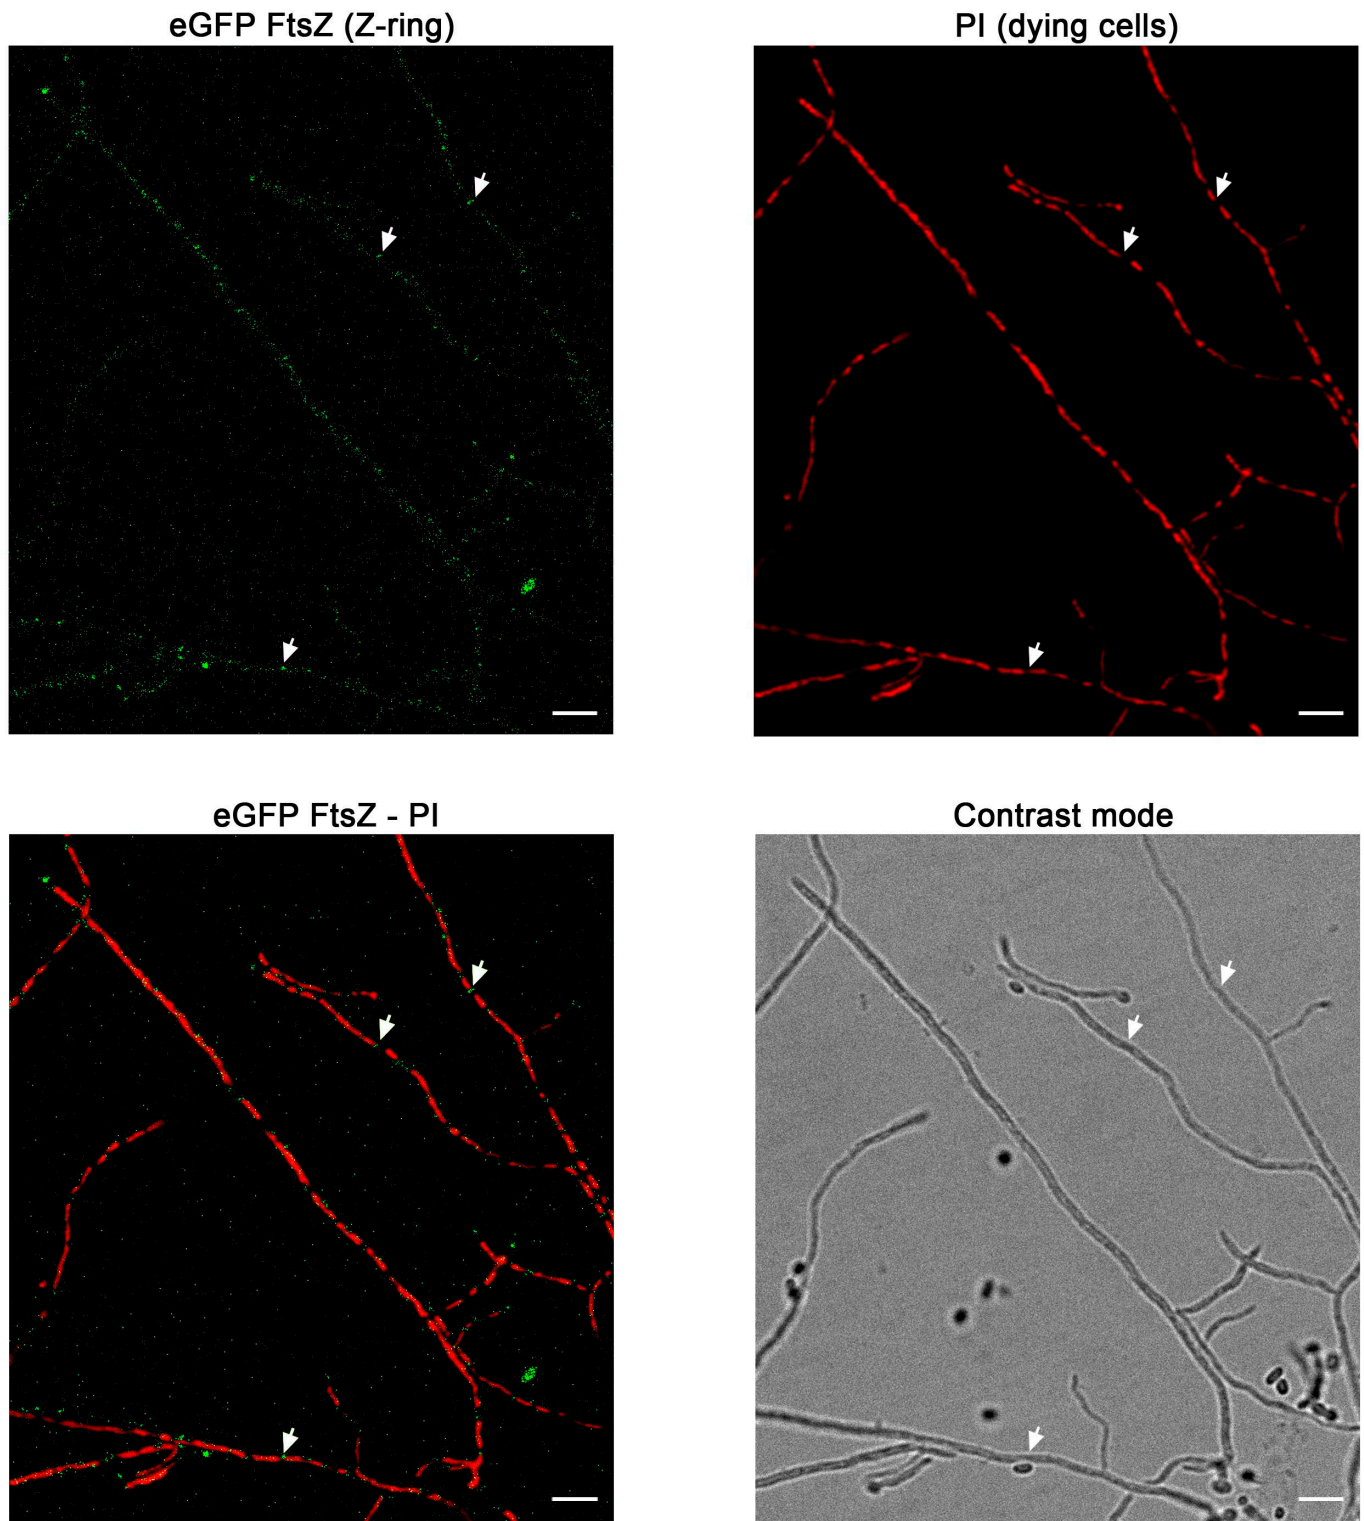

**Supplementary Fig. 3. Images showing the colocalization of Z-rings, PI permeability barriers, cross-membranes and cross-walls. Scale bars correspond to 4  $\mu$ m. (A-D) eGFP-FtsZ (Z-rings, green) and PI (dying cells, red) staining. Arrows indicate Z-rings colocalizing with PI permeability borders. Ten-hour GYM solid cultures.**

**D****eGFP FtsZ (Z-ring)**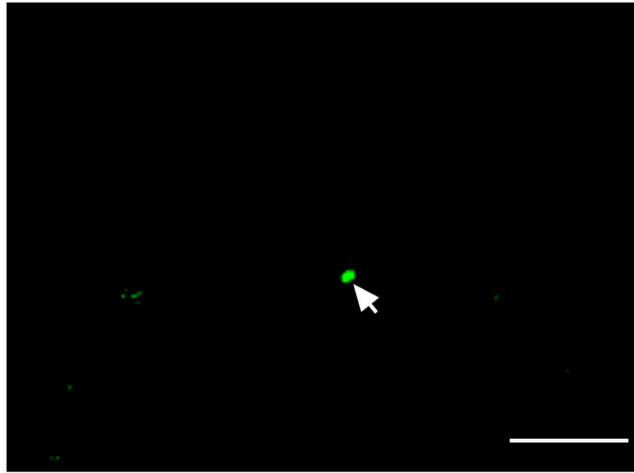**PI (dying cells)**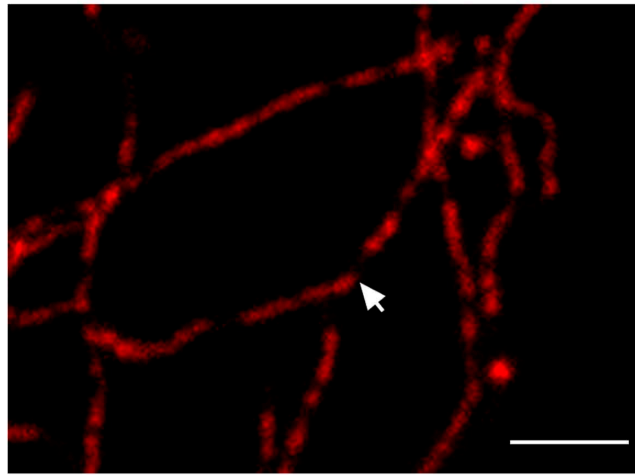**eGFP FtsZ - PI**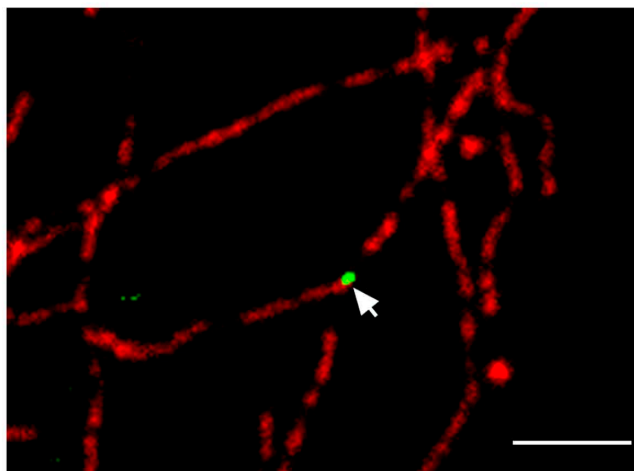

**Supplementary Fig. 3. Images showing the colocalization of Z-rings, PI permeability barriers, cross-membranes and cross-walls.** Scale bars correspond to 4  $\mu\text{m}$ . (A-D) eGFP-FtsZ (Z-rings, green) and PI (dying cells, red) staining. Arrows indicate Z-rings colocalizing with PI permeability borders. Ten-hour GYM solid cultures.

**E****HADA(blue) and PI (red)**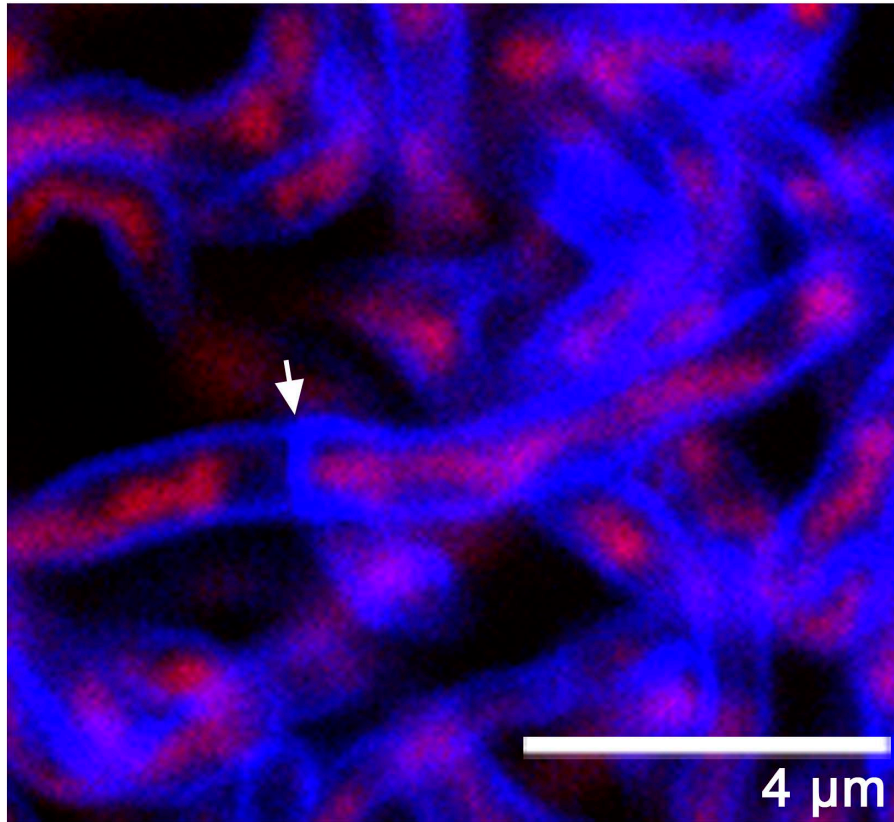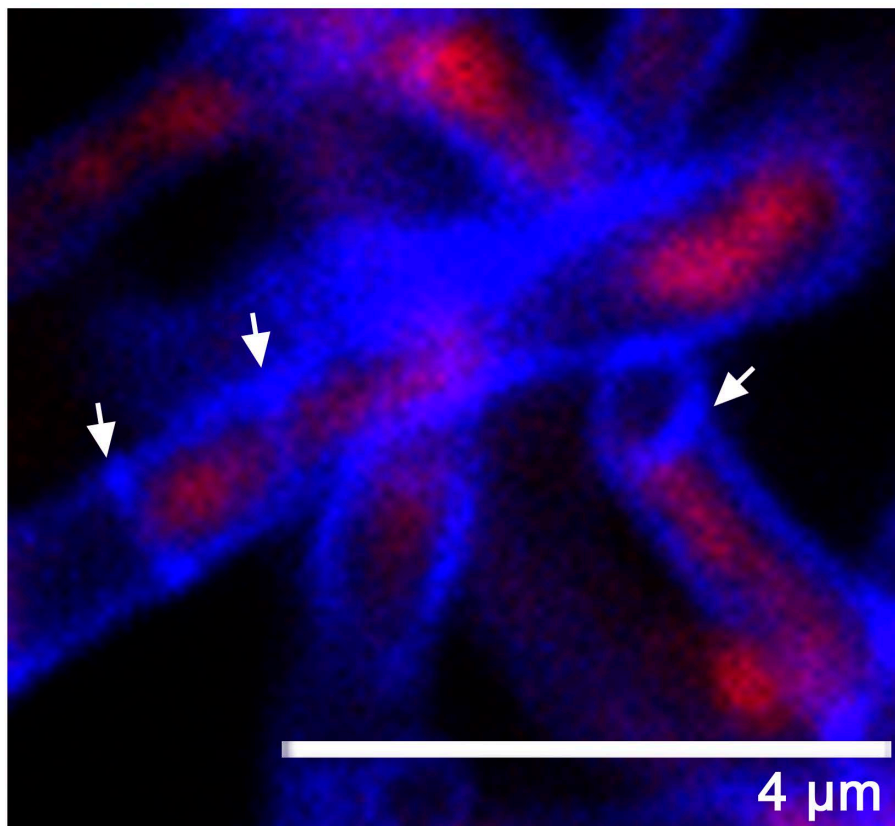

**Supplementary Fig. 3. Images showing the colocalization of Z-rings, PI permeability barriers, cross-membranes and cross-walls.** Scale bars correspond to 4  $\mu\text{m}$ .

(E) HADA (cell wall, blue) and PI (dying cells, red) staining. Arrows indicate the colocalization between cell walls and PI permeability barriers. Fifteen-hour liquid GYM cultures.

**F**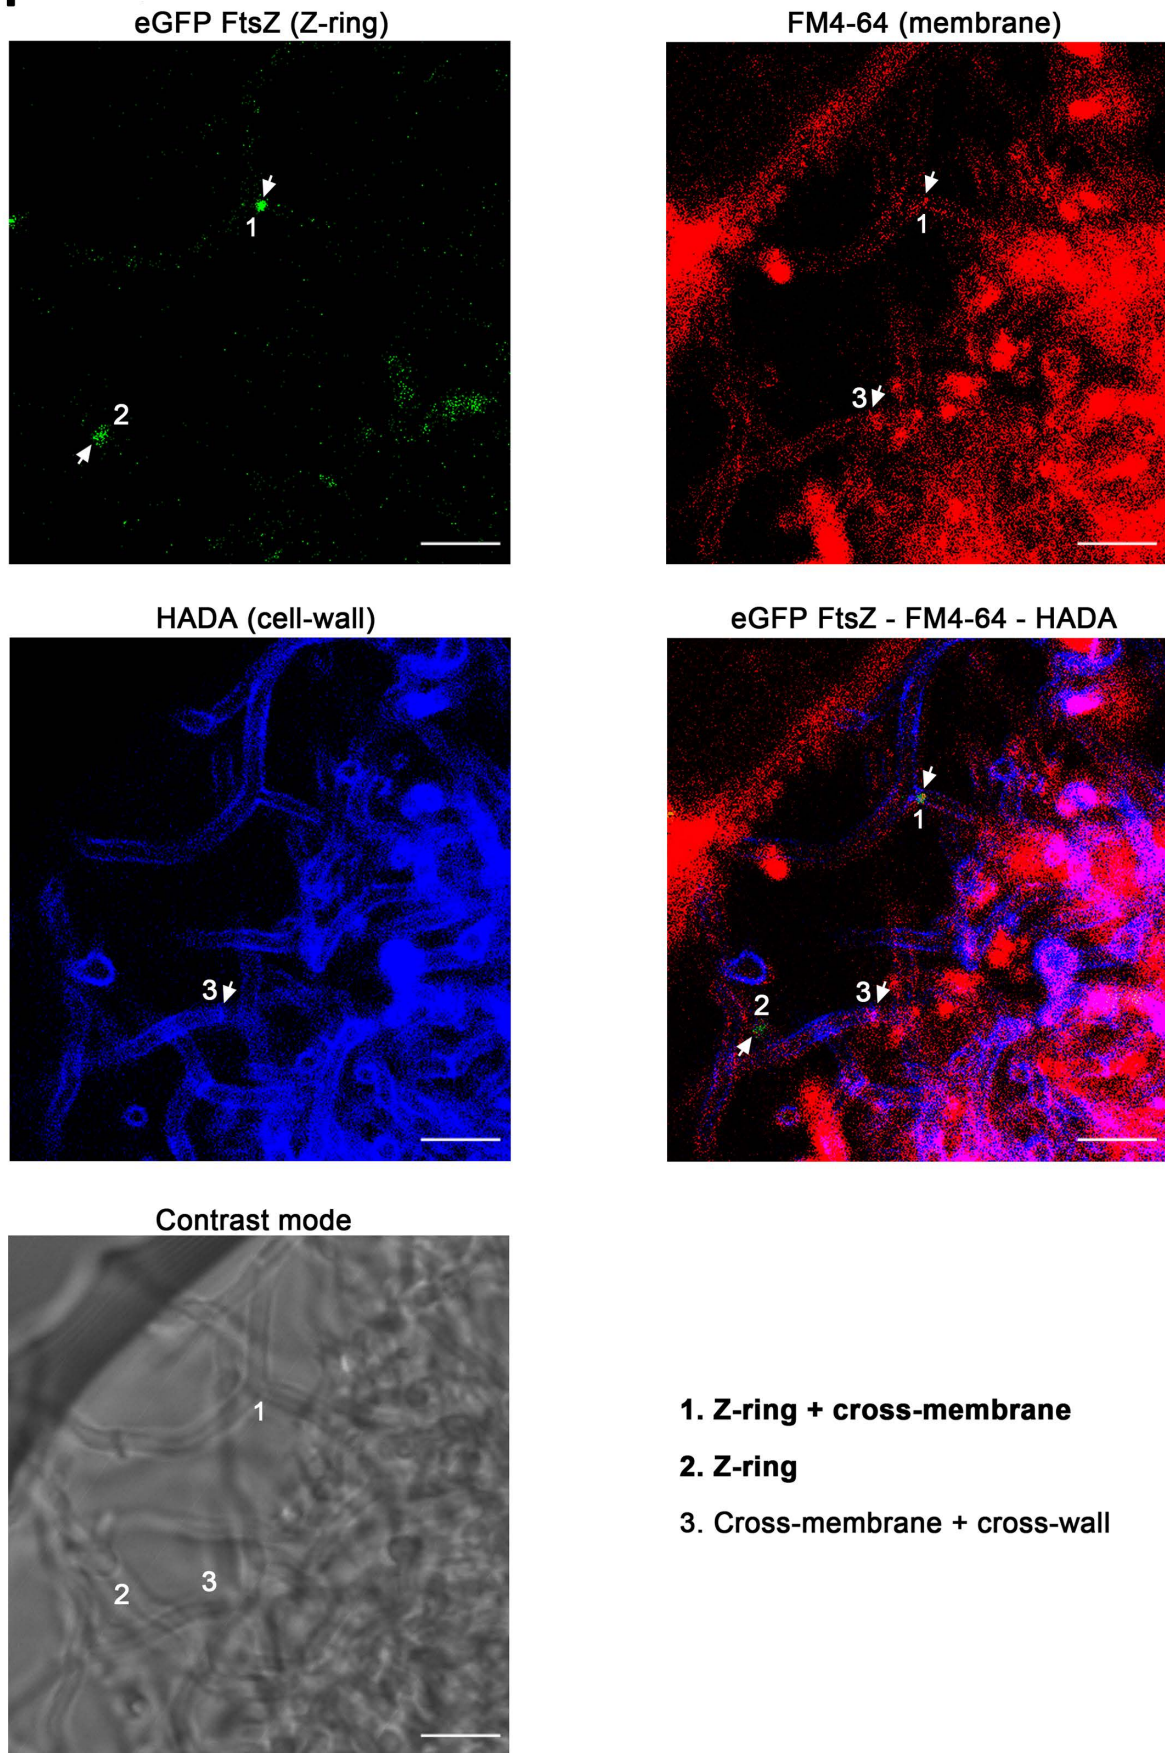

**Supplementary Fig. 3. Images showing the colocalization of Z-rings, PI permeability barriers, cross-membranes and cross-walls.** Scale bars correspond to 4  $\mu$ m.

(F-I) eGFP-FtsZ (Z-rings, green), HADA (cell wall, blue) and FM4-64 (membrane, red) staining. Z-rings, cross-membranes and/or cross-walls colocalize in some cases (arrows).

**G**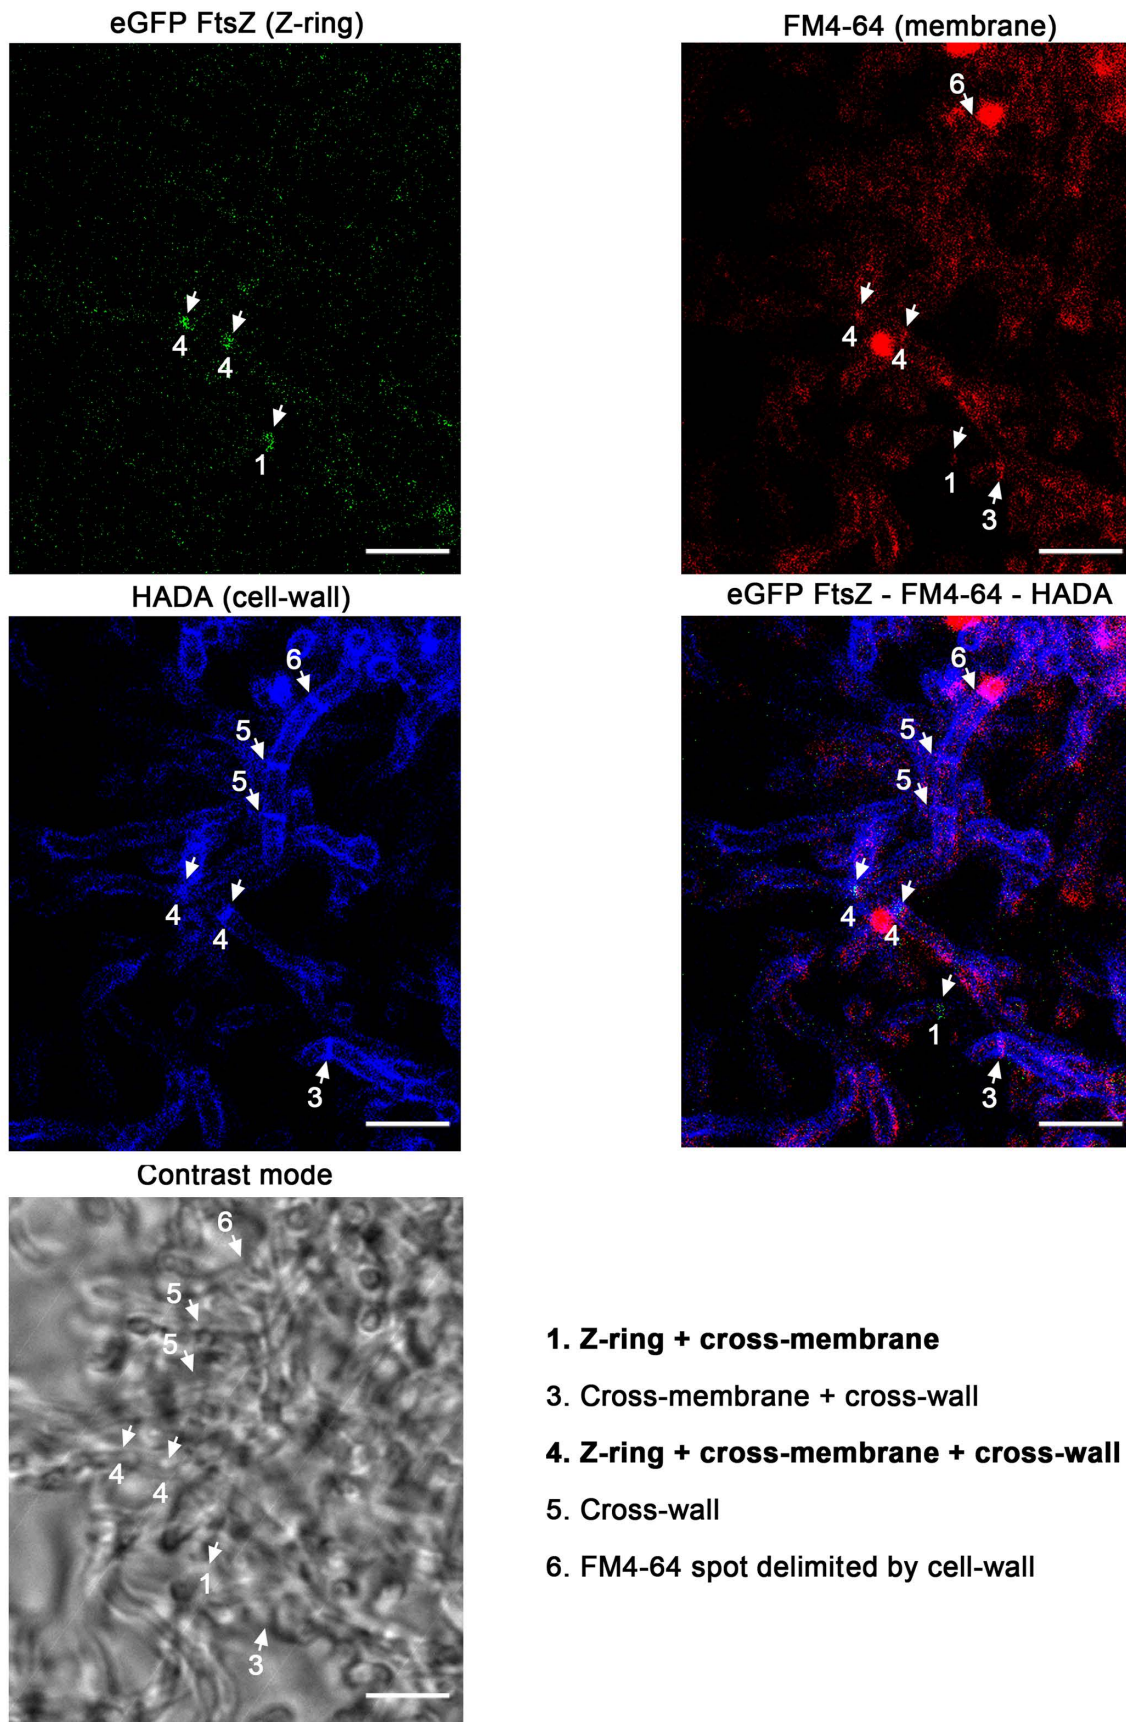

**Supplementary Fig. 3. Images showing the colocalization of Z-rings, PI permeability barriers, cross-membranes and cross-walls.** Scale bars correspond to 4  $\mu$ m. (F-I) eGFP-FtsZ (Z-rings, green), HADA (cell wall, blue) and FM4-64 (membrane, red) staining. Z-rings, cross-membranes and/or cross-walls colocalize in some cases (arrows).

**H**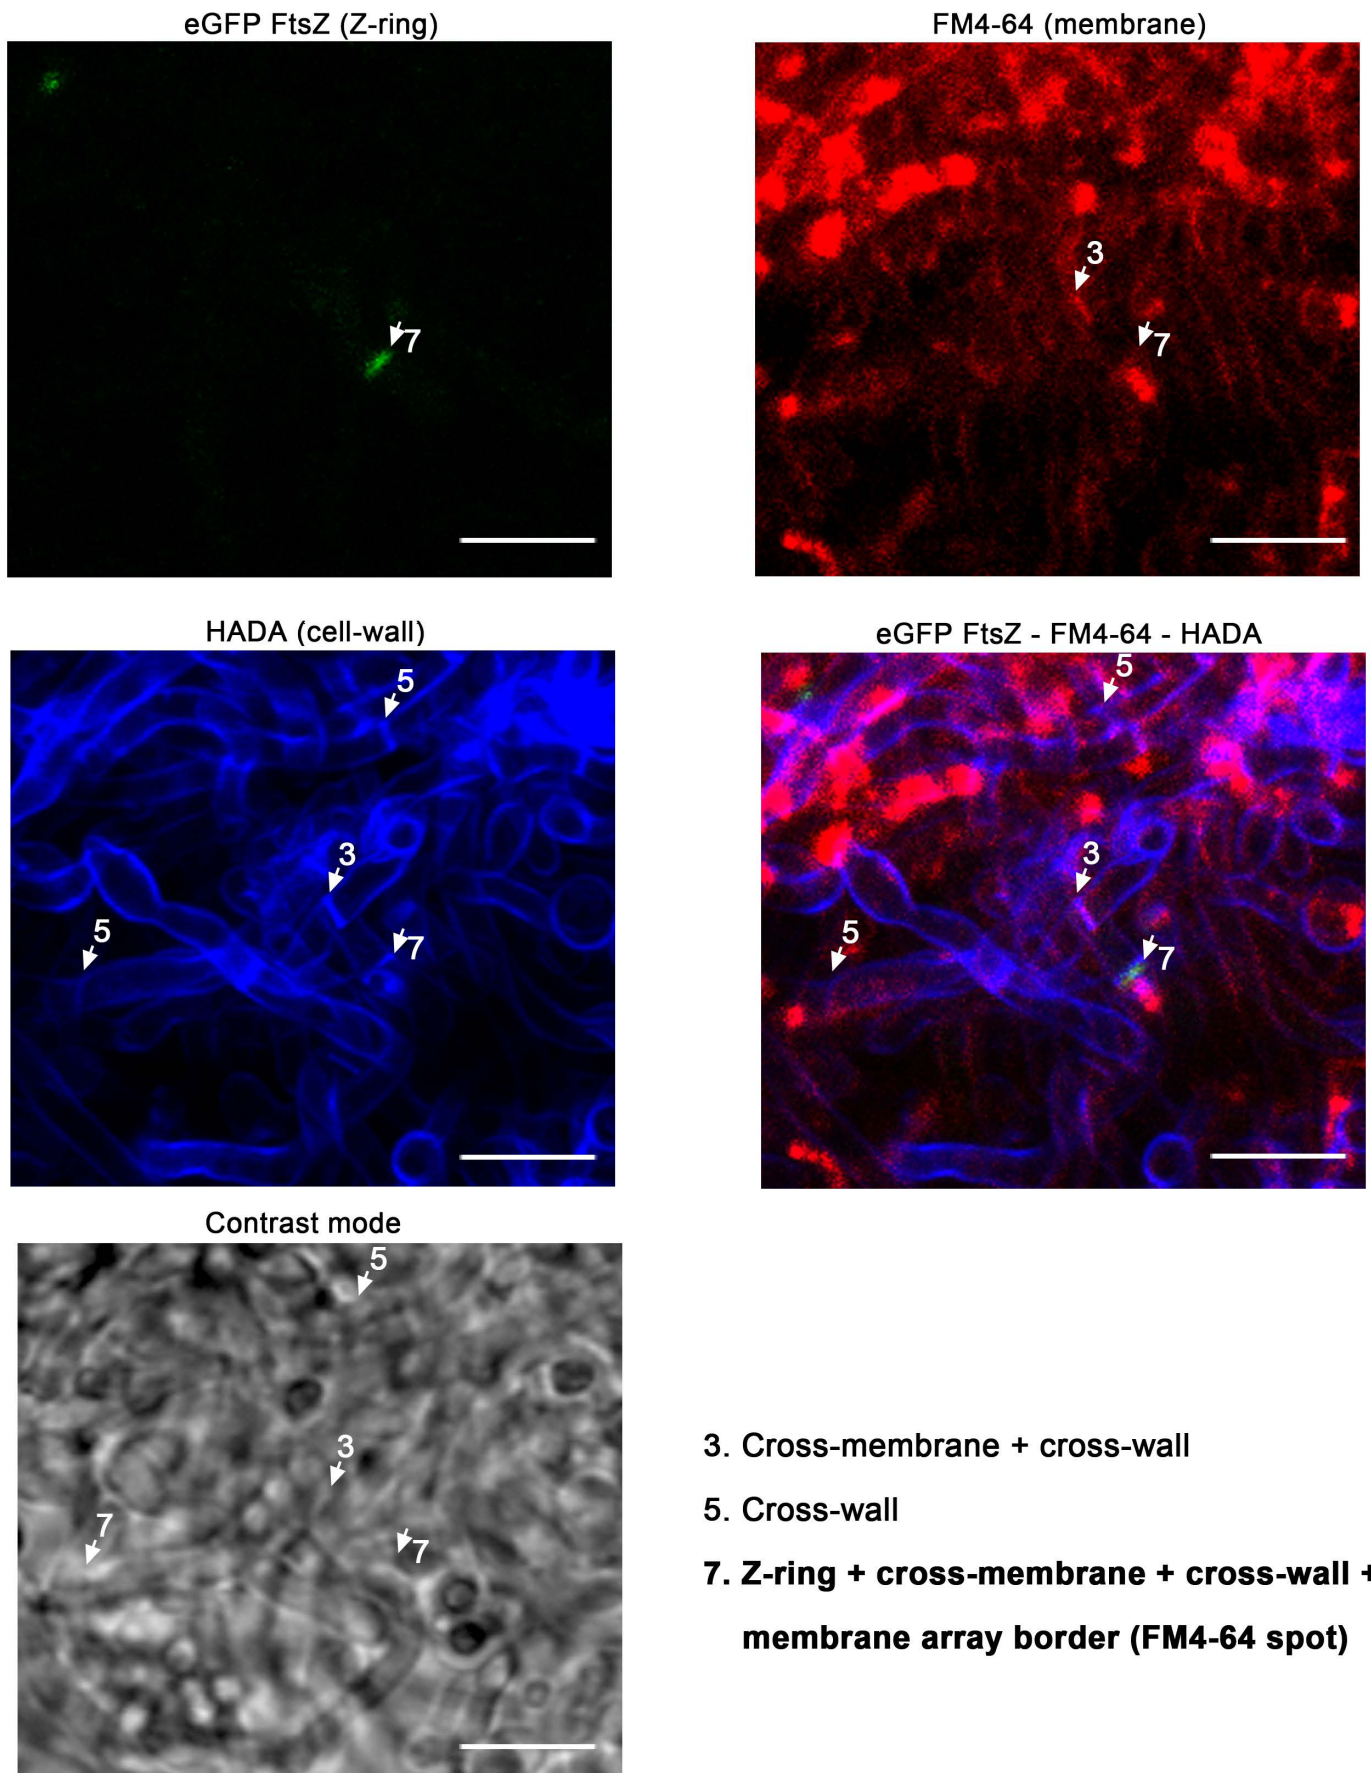

**Supplementary Fig. 3. Images showing the colocalization of Z-rings, PI permeability barriers, cross-membranes and cross-walls.** Scale bars correspond to 4  $\mu$ m. (F-I) eGFP-FtsZ (Z-rings, green), HADA (cell wall, blue) and FM4-64 (membrane, red) staining. Z-rings, cross-membranes and/or cross-walls colocalize in some cases (arrows).



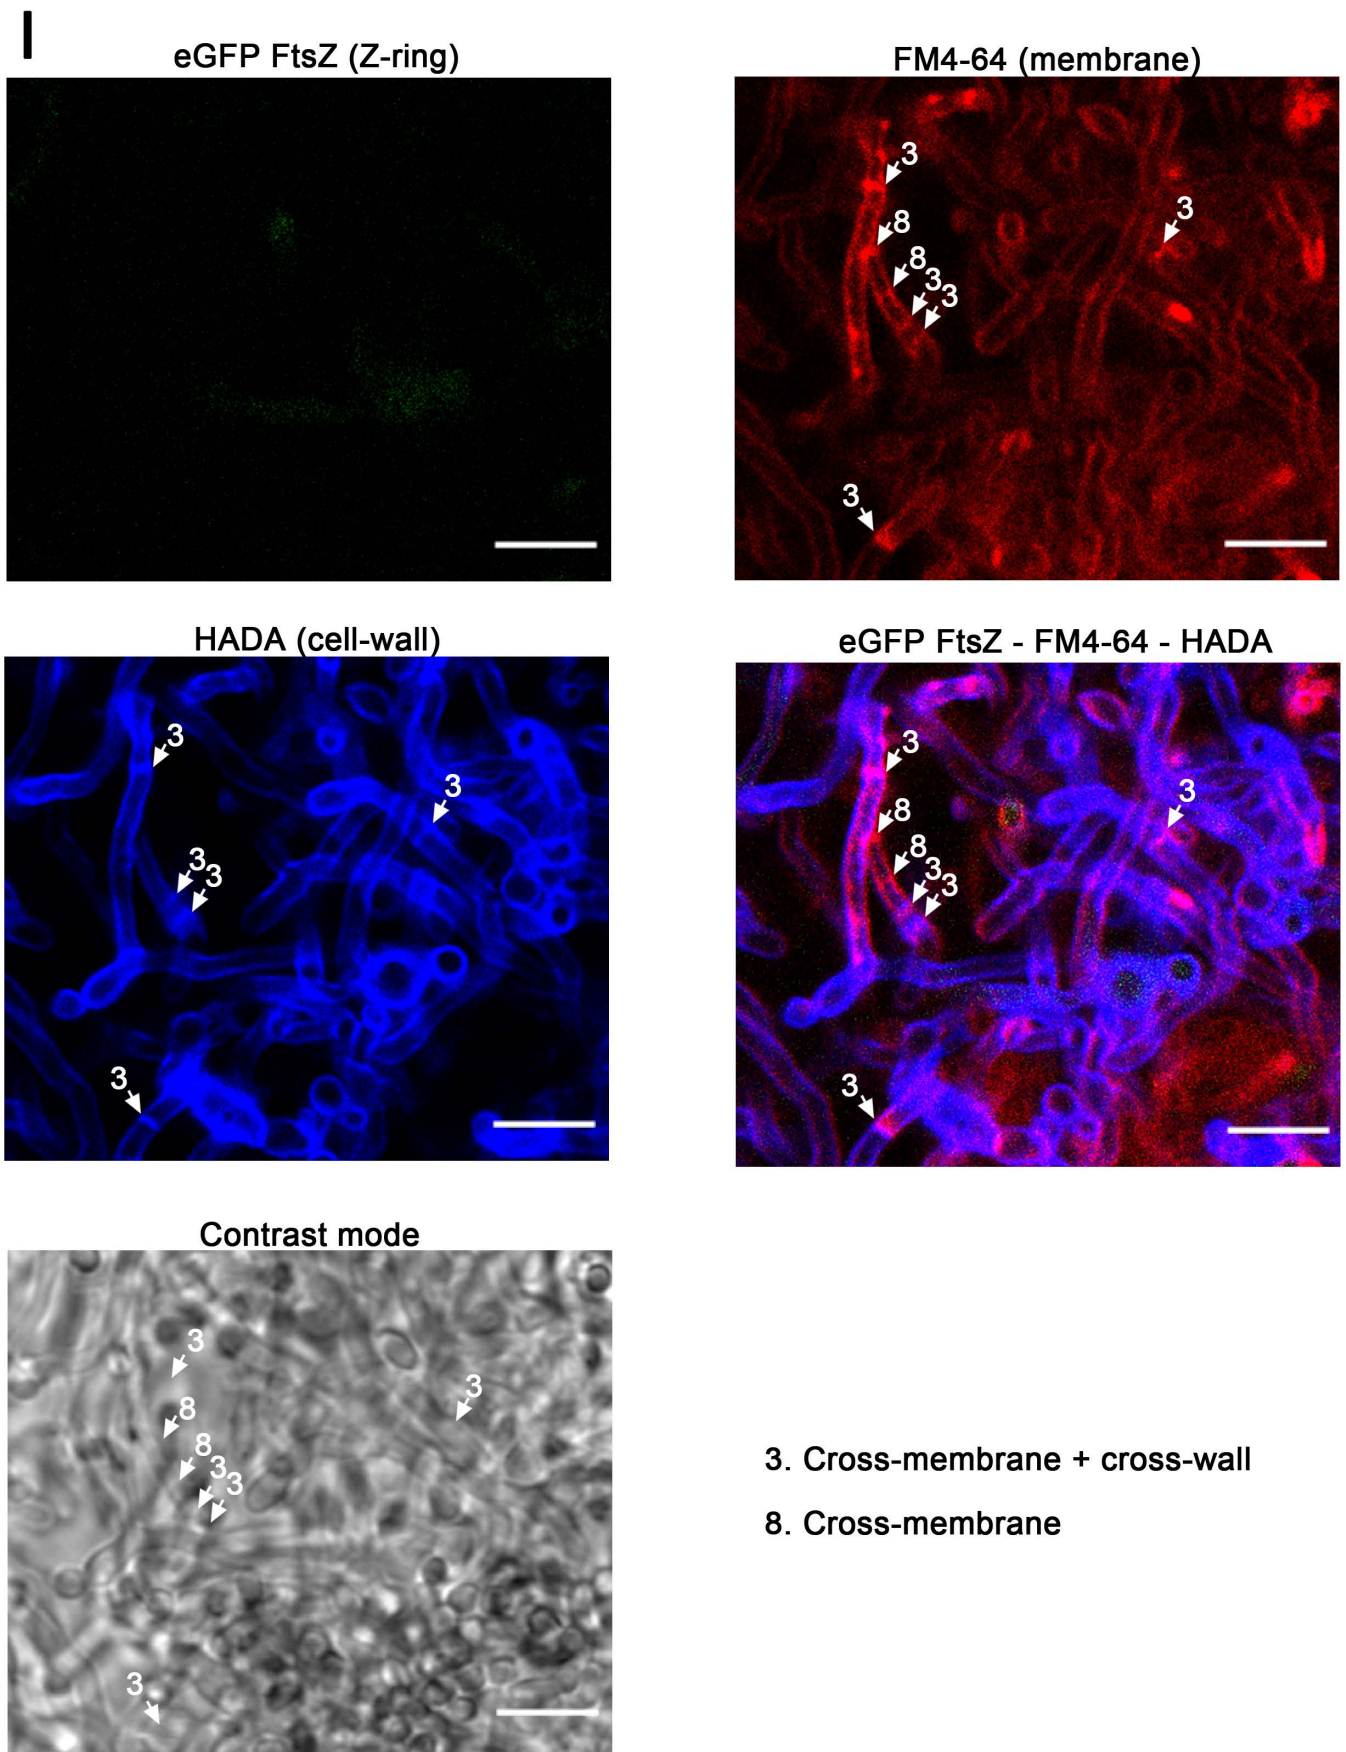

**Supplementary Fig. 3. Images showing the colocalization of Z-rings, PI permeability barriers, cross-membranes and cross-walls. Scale bars correspond to 4  $\mu$ m.**

(F-I) eGFP-FtsZ (Z-rings, green), HADA (cell wall, blue) and FM4-64 (membrane, red) staining. Z-rings, cross-membranes and/or cross-walls colocalize in some cases (arrows).

A

SYTO9-PI staining (48h)

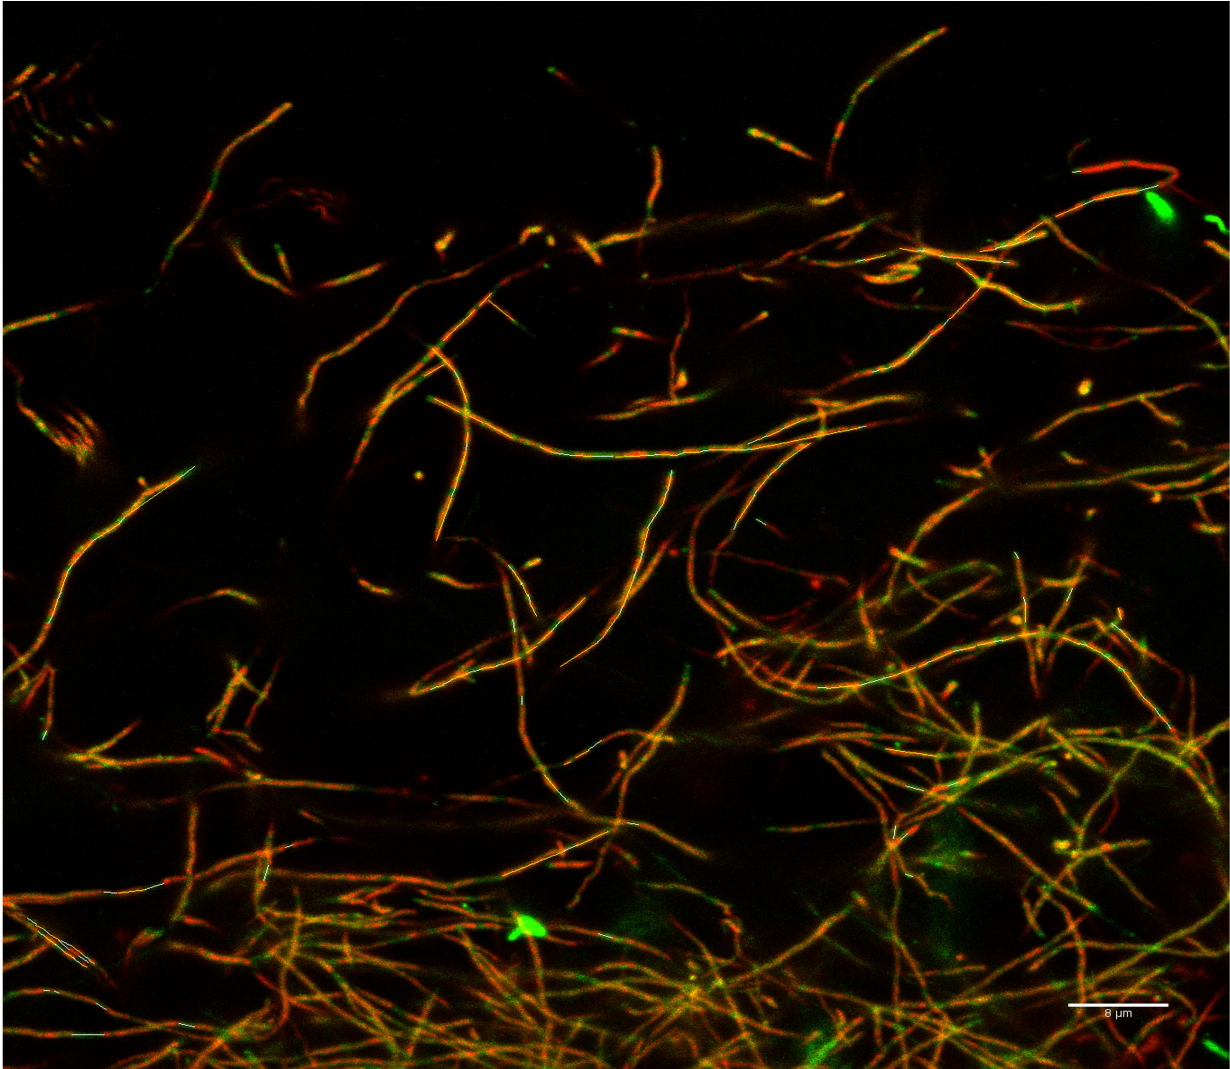

**PI stained segments**

- 100 segments
- Mean: 1.83  $\mu\text{m}$
- SD 1.27  $\mu\text{m}$
- Median 1.42  $\mu\text{m}$

**SYTO9 stained segments**

- 100 segments
- Mean: 0.85  $\mu\text{m}$
- SD 0.41  $\mu\text{m}$
- Median 0.74  $\mu\text{m}$

**Supplementary Fig. 4. Master images used to quantify hyphal compartments in *ΔftsZ* HU133 (48 hours).** Segments used for quantification of the compartment lengths are marked. Scale bars correspond to 8  $\mu\text{m}$ .

(A) Master image used to quantify PI- (red) and SYTO9 (green)-stained segments.

**B****PI / YOPRO-1 staining**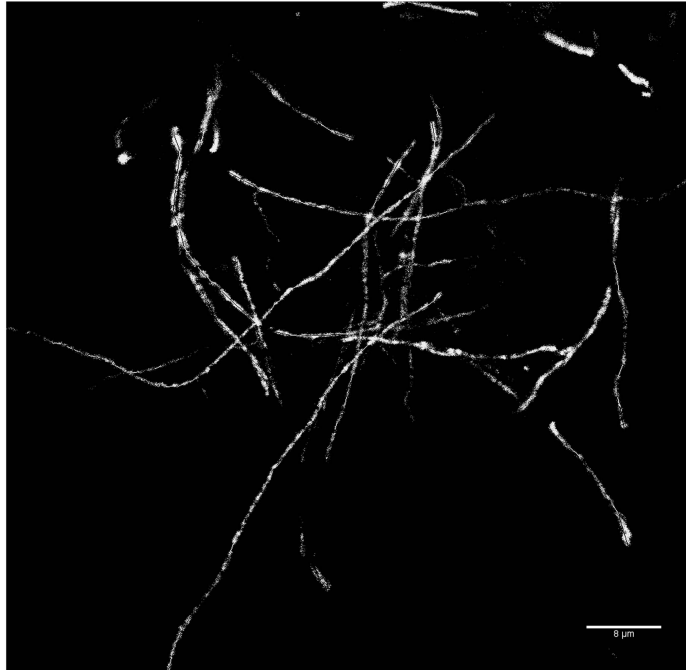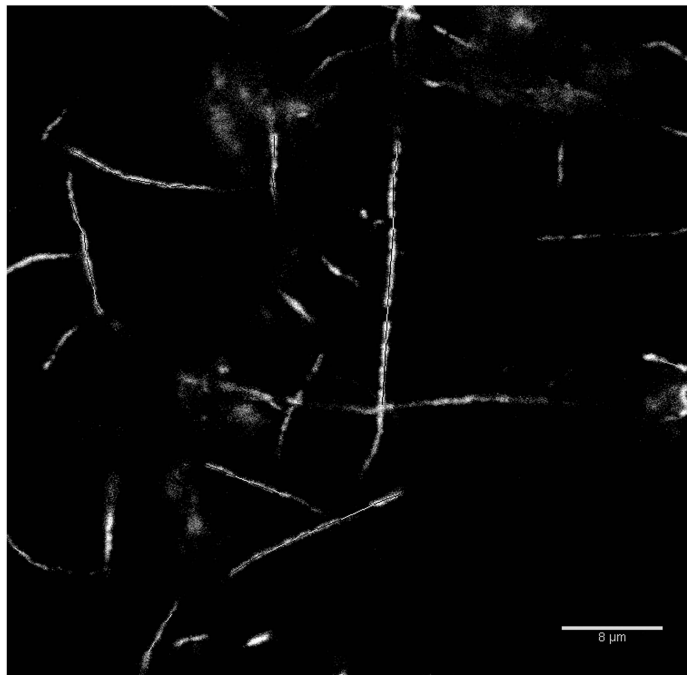**PI / YOPRO-1 stained segments**

- 100 segments
- Mean: 1.83  $\mu\text{m}$
- SD 1.27  $\mu\text{m}$
- Median 1.42  $\mu\text{m}$

**Unstained segments**

- 102 segments
- Mean: 0.81  $\mu\text{m}$
- SD 0.36  $\mu\text{m}$
- Median 0.72  $\mu\text{m}$

**Supplementary Fig. 4. Master images used to quantify hyphal compartments in *ΔftsZ* HU133 (48 hours).** Segments used for quantification of the compartment lengths are marked. Scale bars correspond to 8  $\mu\text{m}$ .

(B) Master image used to quantify YOPRO-1- and PI-stained and unstained segments. The same segments were stained with YOPRO-1 and PI.

**A**

**HADA (fluorescent D-alanine) and contrast mode**

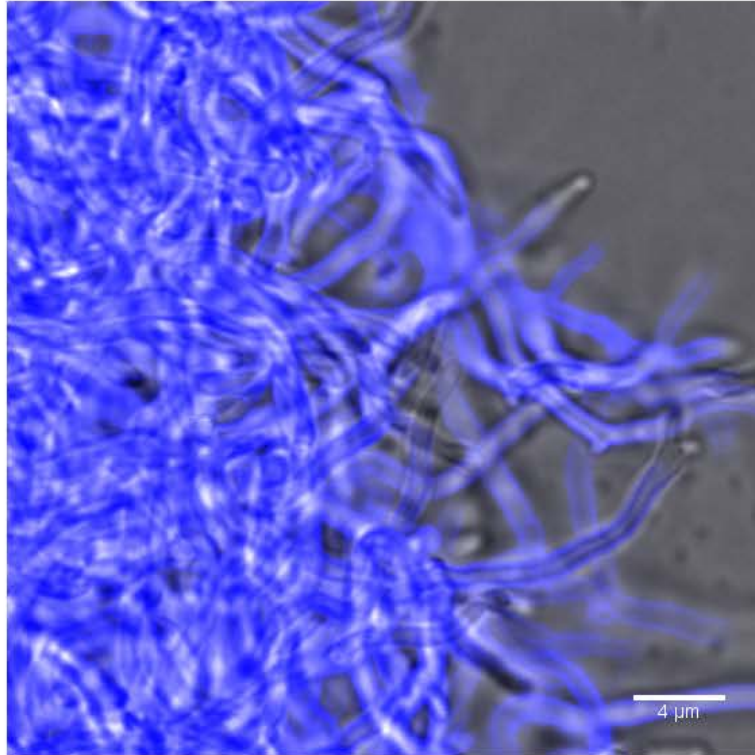

**HADA (fluorescent D-alanine)**

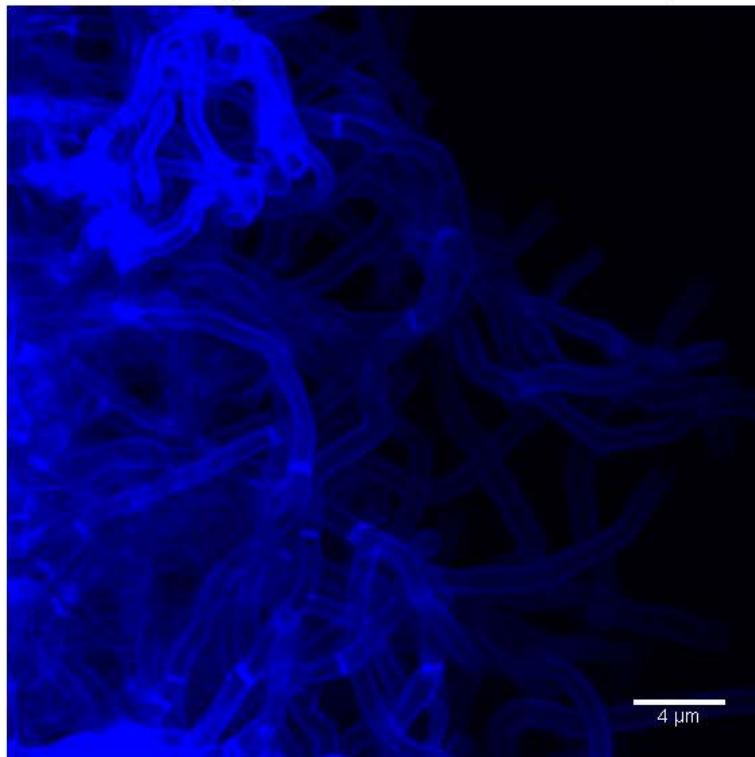

**Supplementary Fig. 5. D-amino acid pulse-labeling staining (cell wall) of *S. coelicolor* and  $\Delta$ *ftsZ* HU133 (15 hours in liquid GYM medium). Scale bars correspond to 4  $\mu$ m.**

**(A) *S. coelicolor***

**B**

HADA (fluorescent D-alanine) and contrast mode

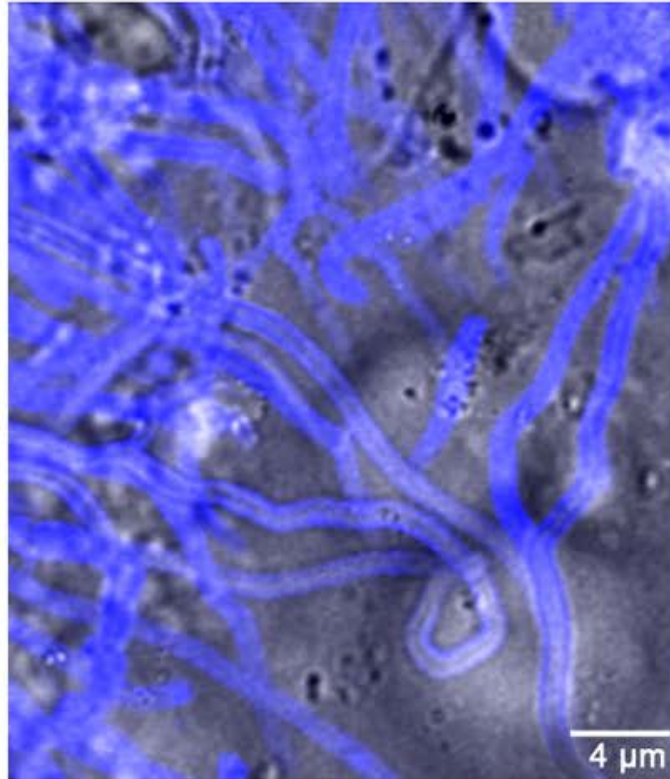

HADA (fluorescent D-alanine)

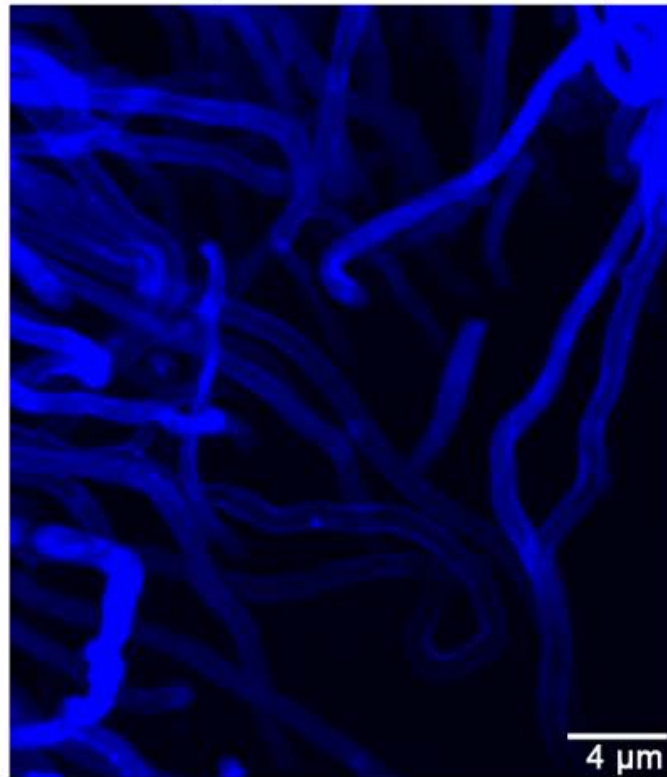

**Supplementary Fig. 5. D-amino acid pulse-labeling staining (cell wall) of *S. coelicolor* and  $\DeltaftsZ$  HU133 (15 hours in liquid GYM medium). Scale bars correspond to 4  $\mu$ m.**

**(B)  $\DeltaftsZ$  HU133**

A

Protoplasts (16h) *S. coelicolor* M145 - Contrast mode

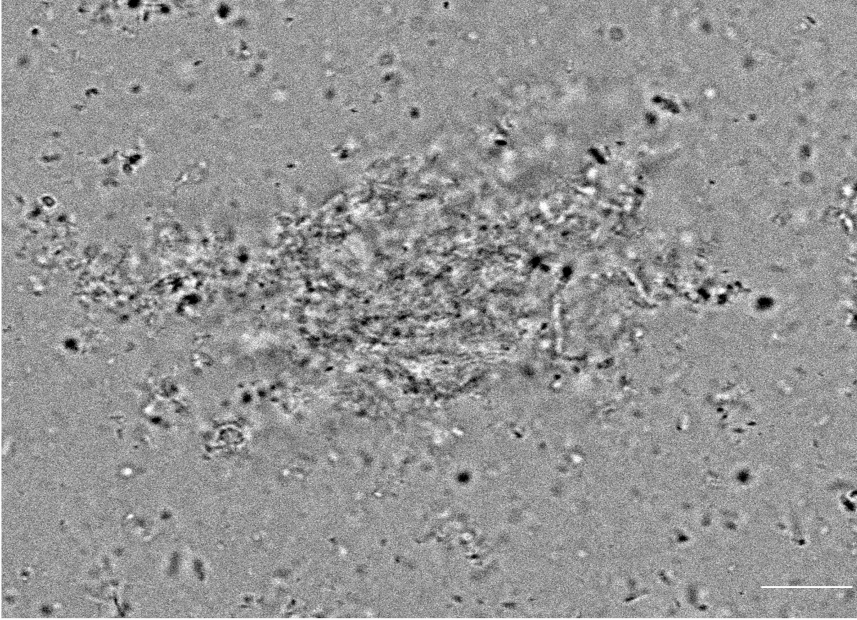

Protoplasts (16h) *S. coelicolor* M145 - SYTO9-PI staining

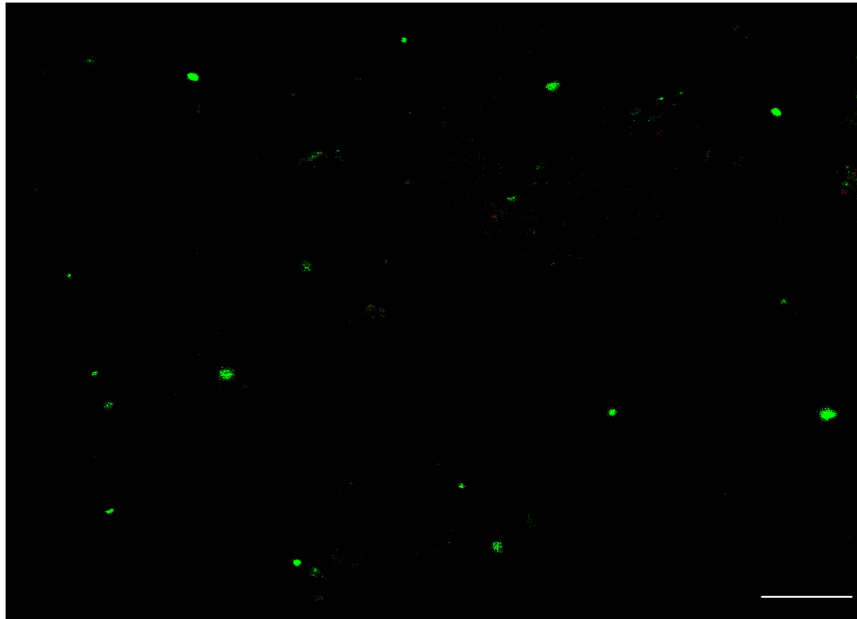

**Supplementary Fig. 6. Protoplast formation and quantification.** Scale bars correspond to 8  $\mu\text{m}$ .

(A) Protoplasts stained with PI and SYTO9. Cell debris observed in phase contrast mode is devoid of stained cells, indicating a high efficiency of protoplast formation.

B

*S. coelicolor* M145 (16h) SYTO9-PI staining

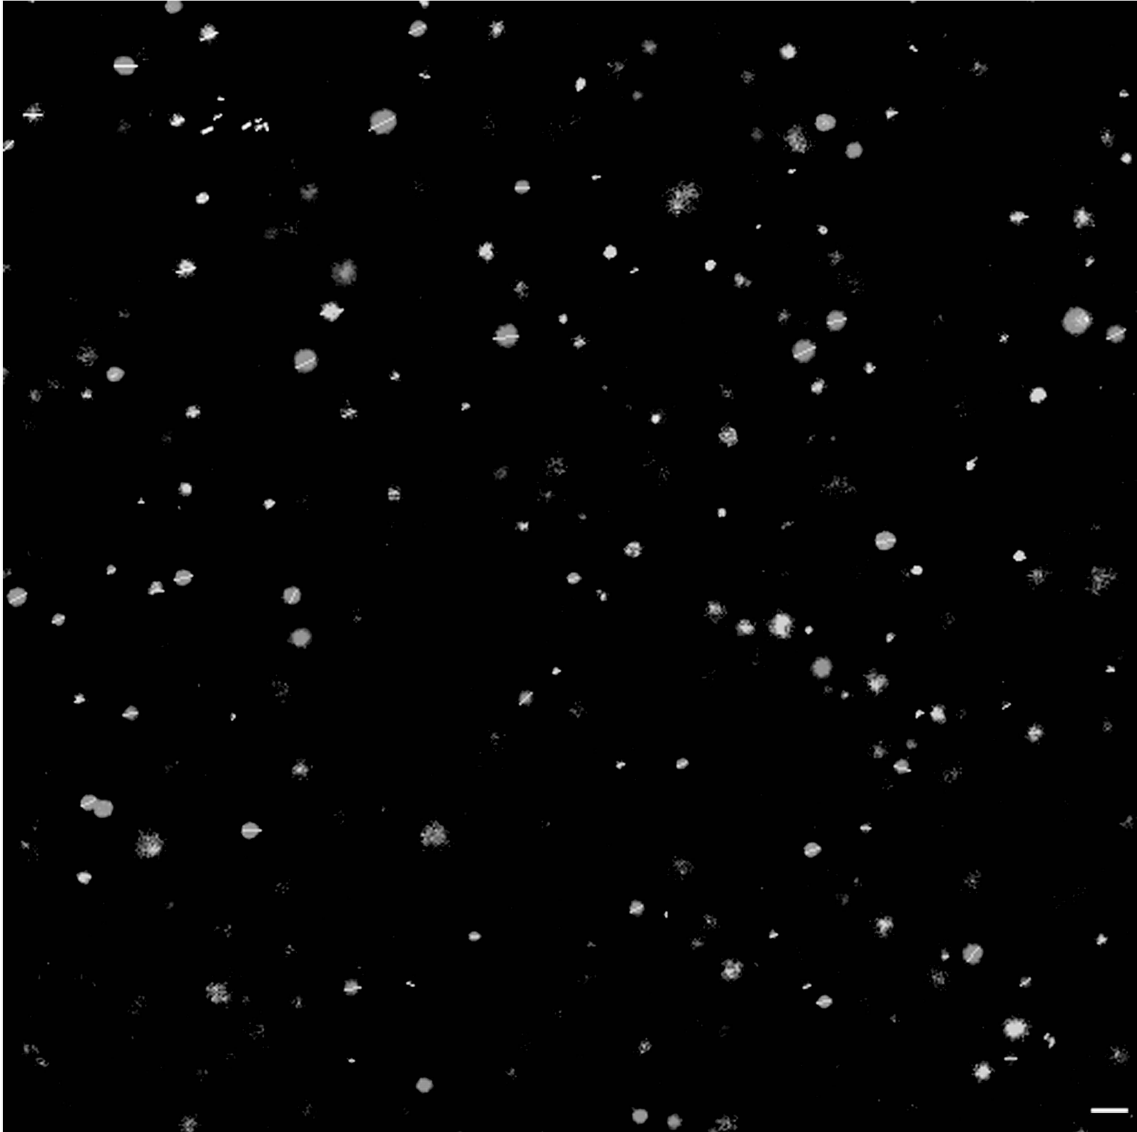

**Protoplasts SYTO9-PI staining**

- 100 protoplasts
- Mean: 2.2  $\mu\text{m}$
- SD 1.13  $\mu\text{m}$
- Median 1.9  $\mu\text{m}$

**Supplementary Fig. 6. Protoplast formation and quantification.** Scale bars correspond to 8  $\mu\text{m}$ .

(B) Master images used to quantify protoplast diameter in *S. coelicolor* M145. Protoplasts were stained with PI and SYTO9. Protoplasts used for quantification are marked.

C

*ΔftsZ* HU133 (48h) SYTO9-PI staining

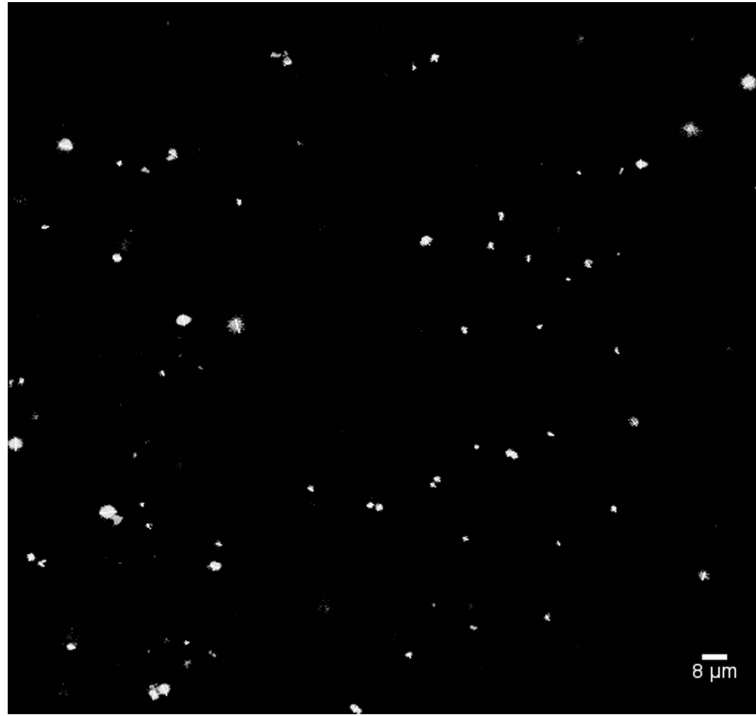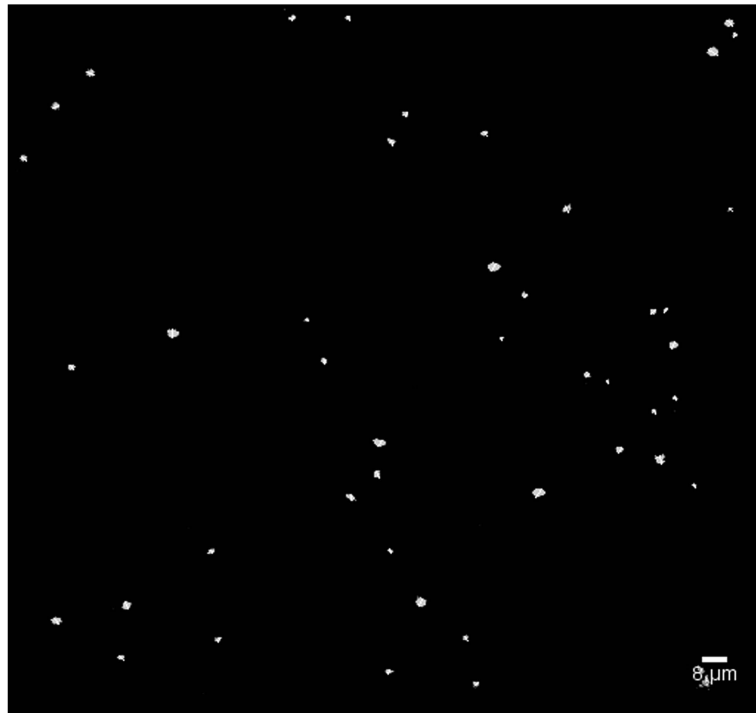

**Protoplasts SYTO9-PI staining**

- 100 protoplasts
- Mean: 1.98  $\mu\text{m}$
- SD 0.8  $\mu\text{m}$
- Median 1.81  $\mu\text{m}$

**Supplementary Fig. 6. Protoplast formation and quantification.** Scale bars correspond to 8  $\mu\text{m}$ .

(C) Master images used to quantify protoplast diameter in *ΔftsZ* HU133. Protoplasts were stained with PI and SYTO9. Protoplasts used for quantification are marked.



**Supplementary Table 1: TMT proteomics.**

(A) Peptides used for FtsZ protein abundance quantification. (B) FtsZ protein abundance. (C) FtsZ relative abundance (relative to 16-hours).

R1-R4 Biological replicates 1-4.

**(A) FtsZ peptides**

| FtsZ Peptides                | TMT MI 16-hours |      |      |      | TMT MII 30-hours |      |      | TMT MII 65-hours |      |      |
|------------------------------|-----------------|------|------|------|------------------|------|------|------------------|------|------|
|                              | R1              | R2   | R3   | R4   | R1               | R2   | R3   | R1               | R2   | R3   |
| AAPQNYLAVIK                  | 0.14            | 0.15 | 0.15 | 0.13 | 0.12             | 0.12 | 0.12 | 0.03             | 0.03 | 0.03 |
| ANQAEDGIAELR                 | 0.13            | 0.10 | 0.10 | 0.10 | 0.08             | 0.08 | 0.07 | 0.10             | 0.10 | 0.11 |
| AVAAAEMAISPLLEASIDGAR        | 0.11            | 0.10 | 0.11 | 0.11 | 0.10             | 0.09 | 0.09 | 0.10             | 0.09 | 0.09 |
| DNVLGSSSAK                   | 0.10            | 0.11 | 0.11 | 0.09 | 0.09             | 0.10 | 0.08 | 0.09             | 0.11 | 0.11 |
| EEPEPAPVPEPVADLPVSPPPVPPSR   | 0.12            | 0.12 | 0.12 | 0.10 | 0.11             | 0.11 | 0.10 | 0.07             | 0.07 | 0.07 |
| EEVDTLIVIPNDR                | 0.14            | 0.11 | 0.11 | 0.11 | 0.11             | 0.11 | 0.10 | 0.08             | 0.07 | 0.07 |
| GADMVFTVAGEGGGTGTGGAPVVANIAR | 0.11            | 0.12 | 0.11 | 0.10 | 0.12             | 0.11 | 0.12 | 0.08             | 0.07 | 0.06 |
| GLGAGANPAVGR                 | 0.11            | 0.11 | 0.11 | 0.10 | 0.10             | 0.10 | 0.09 | 0.08             | 0.09 | 0.09 |
| RDNVLGSSSAK                  | 0.10            | 0.12 | 0.10 | 0.10 | 0.10             | 0.10 | 0.09 | 0.09             | 0.10 | 0.10 |
| SVMSEAGSALMGIGSAR            | 0.10            | 0.11 | 0.11 | 0.10 | 0.11             | 0.10 | 0.10 | 0.09             | 0.09 | 0.09 |
| TYSDSAAEELDVPDFLK            | 0.14            | 0.14 | 0.13 | 0.12 | 0.12             | 0.12 | 0.12 | 0.04             | 0.05 | 0.04 |
| VIGVGGGGVNAINR               | 0.13            | 0.12 | 0.12 | 0.11 | 0.11             | 0.10 | 0.10 | 0.07             | 0.06 | 0.07 |
| VTVIAAGFDGGQPPSK             | 0.13            | 0.13 | 0.12 | 0.11 | 0.12             | 0.11 | 0.11 | 0.06             | 0.06 | 0.06 |

**(B) FtsZ protein (53% sequence coverage)**

| Protein | TMT MI 16-hours |      |      |      | TMT MII 30-hours |      |      | TMT MII 65-hours |      |      | TMT abundance |        |        | q-values        |                 |                  |
|---------|-----------------|------|------|------|------------------|------|------|------------------|------|------|---------------|--------|--------|-----------------|-----------------|------------------|
|         | R1              | R2   | R3   | R4   | R1               | R2   | R3   | R1               | R2   | R3   | MI 16h        | MII 30 | MII 65 | MI16h vs MII65h | MI16h vs MII30h | MII30h vs MII65h |
| FtsZ    | 0.13            | 0.13 | 0.13 | 0.12 | 0.12             | 0.12 | 0.12 | 0.06             | 0.06 | 0.06 | 0.13          | 0.12   | 0.06   | 0.03            | 0.00            | 0.00             |

**(C) FtsZ relative abundance (relative to 16-hours)**

| Sample       | Time  | TMT abundance |      |      | TMT ratios (relative to 16-hours) |      |      | FtsZ abundance |        |
|--------------|-------|---------------|------|------|-----------------------------------|------|------|----------------|--------|
|              |       | R1            | R2   | R3   | R1                                | R2   | R3   | TMT average    | TMT SD |
| MI 16-hours  | 16.00 | 0.13          | 0.13 | 0.13 | 1.00                              | 1.00 | 1.00 | 1.00           | 0.00   |
| MII 30-hours | 30.00 | 0.12          | 0.12 | 0.12 | 0.90                              | 0.90 | 0.90 | 0.90           | 0.00   |
| MII 65-hours | 65.00 | 0.06          | 0.06 | 0.06 | 0.49                              | 0.44 | 0.43 | 0.45           | 0.03   |

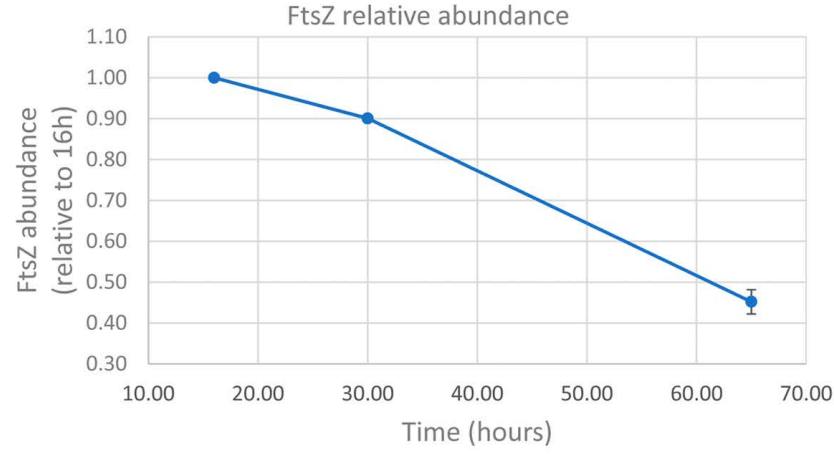

Supplement: ncomms12467-s1.pdf [file ncomms12467-s1.pdf]
